1 **Title: TOR coordinates nucleotide availability with ribosome biogenesis in plants**

2 **Short Title: TOR coordinates plant nucleotide metabolism**

3 Michael Busche<sup>1,2</sup>, M. Regina Scarpin<sup>1,2</sup>, Robert Hnasko<sup>3</sup>, Jacob O. Brunkard<sup>1,2\*</sup>

4 <sup>1</sup>Department of Plant and Microbial Biology, University of California, Berkeley, CA  
5 94720

6 <sup>2</sup>Plant Gene Expression Center, USDA Agricultural Research Service, Albany, CA  
7 94710

8 <sup>3</sup>Produce Safety and Microbiology Research Unit, Western Regional Research Center,  
9 Pacific West Area, USDA Agricultural Research Service

10 \*to whom correspondence should be addressed: [brunkard@berkeley.edu](mailto:brunkard@berkeley.edu)

11

12 The author responsible for distribution of materials integral to the findings presented in  
13 this article in accordance with the policy described in the Instructions for Authors  
14 ([www.plantcell.org](http://www.plantcell.org)) is Jacob O. Brunkard ([brunkard@berkeley.edu](mailto:brunkard@berkeley.edu)).

15

16

## 17 **ABSTRACT**

18           TARGET OF RAPAMYCIN (TOR) is a conserved eukaryotic Ser/Thr protein  
19 kinase that coordinates growth and metabolism with nutrient availability. We conducted  
20 a medium-throughput functional genetic screen to discover essential genes that  
21 promote TOR activity in plants, and identified a critical regulatory enzyme, cytosolic  
22 phosphoribosyl pyrophosphate (PRPP) synthetase (PRS4). PRS4 synthesizes  
23 cytosolic PRPP, a key upstream metabolite in nucleotide synthesis and salvage  
24 pathways. We found that *prs4* knockouts are embryo-lethal in *A. thaliana*, and that  
25 silencing *PRS4* expression in *N. benthamiana* causes pleiotropic developmental  
26 phenotypes, including dwarfism, aberrant leaf shape, and delayed flowering.  
27 Transcriptomic analysis revealed that ribosome biogenesis is among the most strongly  
28 repressed processes in *prs4* knockdowns. Building on these results, we discovered that  
29 TOR activity is inhibited by chemical or genetic disruption of nucleotide biosynthesis, but  
30 that this effect can be reversed by supplying plants with physiological levels of  
31 nucleotides. Finally, we show that TOR transcriptionally promotes nucleotide  
32 biosynthesis to support the demands of ribosomal RNA synthesis. We propose that  
33 TOR coordinates ribosome biogenesis with nucleotide availability in plants to maintain  
34 metabolic homeostasis and support growth.

35

36

## 37 Introduction

38 Phosphorus (P) is an essential element for plant life, but is not highly available in  
39 agricultural soils, and is the primary limiting factor for crop yield on more than 30% of  
40 global arable land (Vance et al., 2003; López-Arredondo et al., 2014). Crop fertilizers  
41 include high levels of phosphate ( $P_i$ ) to drive plant growth and increase crop yields, but  
42 crops only utilize ~20-30% of  $P_i$  applied to soils, a significant waste of resources that is  
43 also environmentally harmful (López-Arredondo et al., 2014; Correll, 1998). Moreover,  
44  $P_i$  mineral deposits are finite, with  $P_i$  production from mining predicted to begin declining  
45 within fifteen years (Cordell and White, 2011), followed by global depletion of  $P_i$  mineral  
46 deposits within as little as one century. Current models suggest that  $P_i$  fertilizer use will  
47 exceed safe planetary boundaries by 2050 without significant technological advances to  
48 reduce the need for  $P_i$  fertilizers (Springmann et al., 2018). Therefore, a major  
49 agronomic goal is to maximize  $P_i$  uptake and utilization, including by breeding and gene  
50 editing to rewire  $P_i$  sensing, signaling, and allocation networks in crop species.

51 Approximately 50% of the organic phosphorus ( $P_o$ ) in leaves is incorporated in  
52 ribosomal RNA (rRNA) (Veneklaas et al., 2012), with the remaining  $P_o$  divided among  
53 other RNAs, DNA, phospholipids, and P-esters (phosphorylated metabolites, such as  
54 glucose-6-phosphate and free nucleotides, as well as phosphorylated proteins) (Figure  
55 1). Since the majority of  $P_o$  is invested in ribosomes, some species in the *Proteaceae*  
56 family have adapted to  $P_i$ -poor soils by synthesizing relatively few ribosomes, with as  
57 little as 40-fold less ribosomes per leaf fresh weight when compared to *Arabidopsis*  
58 *thaliana* (Sulpice et al., 2014). While reducing the number of ribosomes prevents  $P_i$   
59 deprivation stress in these plants, the consequential decrease in the rate of protein  
60 synthesis dramatically slows plant growth (Sulpice et al., 2014). Balancing the trade-off  
61 between  $P_i$  demand and growth rates by genetically optimizing ribosome abundance in  
62 different tissues and developmental stages in crop species is a promising strategy to  
63 reduce agricultural reliance on  $P_i$  fertilizers (Veneklaas et al., 2012). Achieving this goal  
64 will require deep understanding of the regulation of ribosome biogenesis and the  $P_i$ - and  
65  $P_o$ -sensing mechanisms in plants.

66 TARGET OF RAPAMYCIN (TOR) is a conserved eukaryotic kinase that broadly  
67 coordinates metabolism with nutrient availability (Chantranupong et al., 2015; Shi et al.,  
68 2018), and is a crucial regulator of ribosome abundance (Hannan et al., 2003; Delarue  
69 et al., 2018). When nutrients are available, TOR is active and promotes anabolism and  
70 growth; when nutrients are scarce, TOR is inactive and cells become quiescent, using  
71 catabolic pathways for sustenance (Saxton and Sabatini, 2017). Mutations in the TOR  
72 signaling network, especially mutations that increase TOR activity, can cause or  
73 contribute to a wide range of cancers (Grabiner et al., 2014; Saxton and Sabatini,  
74 2017). One consequence of elevated TOR activity in mutated human cell lines is  
75 increased ribosome biogenesis, because TOR strongly promotes the expression of  
76 ribosomal protein genes, rRNA, and other genes that contribute to ribosome assembly  
77 (Pelletier et al., 2017). As a result, cells with high TOR activity have high nucleotide  
78 demands, and are hypersensitive to chemotherapeutic nucleotide biosynthesis inhibitors  
79 (Valvezan et al., 2017; Vander Heiden and DeBerardinis, 2017). To meet these  
80 nucleotide demands, TOR promotes pyrimidine and purine biosynthesis (Ben-Sahra et  
81 al., 2013; Robitaille et al., 2013; Ben-Sahra et al., 2016), effectively reorganizing cellular  
82 metabolism to support higher levels of rRNA synthesis. Recent studies have further  
83 demonstrated that TOR activity is coordinated with nucleotide availability in human cells  
84 (Emmanuel et al., 2017; Hoxhaj et al., 2017). This coordination is proposed to be  
85 mediated by GTP levels: under purine-limiting conditions, GTP levels decrease,  
86 disabling the small GTPase Rheb that promote TOR activity in humans (Emmanuel et  
87 al., 2017; Hoxhaj et al., 2017). Thus, TOR senses nucleotide availability to serve as a  
88 metabolic checkpoint that maintains homeostasis by coupling nucleotide demand  
89 (primarily rRNA synthesis) with nucleotide biosynthesis.

90 Nucleotide metabolism and signaling are well-studied in humans, because  
91 nucleotide homeostasis is often dysregulated in human diseases (Aird and Zhang,  
92 2015), but little is known about how plants sense and respond to nucleotides.  $P_i$   
93 deprivation can cause a five-fold reduction in free nucleotide levels in plants, making  
94 nucleotides a potentially limiting metabolite in soils with poor  $P_i$  availability (Theodorou  
95 and Plaxton, 1993). In *Chlamydomonas reinhardtii*, a photosynthetic algal species,  $P_i$   
96 starvation reduces TOR activity and genetic manipulation of  $P_i$  metabolism disrupts TOR

97 signaling, demonstrating that TOR can contribute to the maintenance of P<sub>i</sub> homeostasis  
98 (Cuoso *et al.*, 2020). A key intermediate in the incorporation of P<sub>i</sub> into nucleotides is  
99 phosphoribosyl pyrophosphate (PRPP). PRPP is synthesized by phosphoribosyl  
100 pyrophosphate synthetase (PRS, sometimes called ribose-phosphate  
101 diphosphokinase), which transfers the diphosphoryl group from ATP to ribose-5-  
102 phosphate (the end product of the pentose phosphate pathway) in a Mg<sup>2+</sup>-dependent  
103 reaction. PRPP then acts as a donor of phospho-ribose groups for nucleotide and  
104 amino acid synthesis, among other biochemical pathways. PRS has emerged as a key  
105 regulatory enzyme in human cellular nutrient signaling pathways; for example, PRS-  
106 mediated synthesis of PRPP is the rate-limiting step that drives the protein and  
107 nucleotide synthesis necessary for tumorigenesis downstream of the Myc oncogene  
108 (Cunningham *et al.*, 2014).

109 Plant genomes encode several PRS enzymes, with at least one localized to the  
110 plastid and another localized to the cytosol (Figure 1B). Plastids have spatially co-opted  
111 many of the PRPP-dependent metabolic pathways in plants, including *de novo* purine,  
112 histidine, and tryptophan biosynthesis, the pyrimidine salvage pathway, as well as  
113 various metabolic pathways downstream of these molecules, including cytokinin  
114 biosynthesis. Cytosolic PRPP is therefore primarily required to regenerate nucleotides  
115 via the purine salvage pathway and for *de novo* pyrimidine biosynthesis (Lerbs *et al.*,  
116 1980; Witz *et al.*, 2012). In *Arabidopsis thaliana*, four genes encode organellar PRS  
117 enzymes (*PRS1*, *PRS2*, *PRS3*, and *PRS5*) and one gene encodes the cytosolic PRS  
118 enzyme (*PRS4*) (Ito *et al.*, 2011). Here, we show that *PRS4* is an essential gene in  
119 plants that is required to maintain TOR activity. Furthermore, taking a functional  
120 genetics approach in *N. benthamiana* and a chemical genetic approach in *A. thaliana*,  
121 we specifically demonstrate that nucleotides promote TOR activity, and that TOR  
122 transcriptionally promotes nucleotide biosynthesis. We conclude that TOR coordinates  
123 nucleotide availability with ribosome biogenesis to maintain P homeostasis in plants.

124

125

## 126 **Results**

### 127 ***PRS4* drives TOR activity and plant development**

128 In an effort to identify genes that regulate TOR activity, we conducted a medium-  
129 throughput functional genetic screen using virus-induced gene silencing (VIGS) to  
130 silence *N. benthamiana* genes that we predicted to be essential for embryogenesis in *A.*  
131 *thaliana*. To measure TOR activity after gene silencing, we extracted leaf proteins to  
132 prepare Western blots and probed these blots with  $\alpha$ -AtS6K-p449, which specifically  
133 detects a phosphopeptide on plant S6 KINASE (S6K) that is directly phosphorylated by  
134 the TOR kinase complex (Xiong and Sheen, 2012). We found that silencing *PRS4*  
135 strongly reduces S6K-pT449 levels compared to mock treatment (Figure 2A). We then  
136 probed total S6K protein levels with  $\alpha$ -S6K, confirming that total S6K levels do not  
137 decrease in TRV::*NbPRS4*, and therefore demonstrating that TOR activity is severely  
138 reduced in TRV::*NbPRS4* knockdown leaves (Figure 2A).

139 Knocking down *PRS4* expression with TRV::*NbPRS4* caused a range of dramatic  
140 developmental phenotypes (Figure 2B), including delayed flowering, misshapen leaves,  
141 dwarfism, and even lethality: 14% of TRV::*NbPRS4* knockdown plants died shortly after  
142 *PRS4* silencing was induced ( $n = 50$ ), whereas none of the mock-treated plants died.  
143 Surviving TRV::*NbPRS4* leaves were misshapen and as small as 5% the size of leaves  
144 in mock-treated shoots (Figure 2B). Epidermal cells were significantly smaller in  
145 TRV::*NbPRS4* plants (71% the size of cells in mock-treated leaves,  $n \geq 108$ ,  $p < 10^{-3}$ ,  
146 Figure 2C), but the difference in cell size was not enough to explain the severe  
147 reduction in leaf size (Figure 2B), suggesting that *PRS4* is required to promote cell  
148 expansion and cell division. In TRV::*NbPRS4* plants, developmental timing of leaf  
149 initiation and flowering was severely disrupted. Leaf initiation was delayed or  
150 completely arrested three weeks after infiltrating VIGS vectors in TRV::*NbPRS4* plants  
151 (Figure 2B). TRV::*NbPRS4* plants flowered two or more weeks later than mock-treated  
152 plants, and many TRV::*NbPRS4* knockdowns did not flower at all during our six-week  
153 observation period. Despite these clear defects in shoot development, we did not  
154 detect any striking morphological phenotype in histological sections of TRV::*NbPRS4*  
155 knockdown vegetative shoot apical meristems (Figure 2D). Taken together, these

156 results show that *PRS4* is required for diverse developmental processes, including leaf  
157 initiation, expansion, and morphology; the transition from vegetative to reproductive  
158 growth; and both cell expansion and cell division.

### 159 ***PRS4* is essential for plant embryogenesis**

160 As part of a recent high-throughput effort to generate higher order mutations in *A.*  
161 *thaliana*, *prs4/+* was crossed to *prs3/+*, but no offspring in the F<sub>2</sub> generation of this cross  
162 were homozygous for *prs4*, hinting that *PRS4* is essential for *A. thaliana* development  
163 (Bolle et al., 2013). To test this hypothesis, we obtained a putative T-DNA insertion line  
164 in the *PRS4* gene (*At2g42910*), GabiKat-780B11 (Figure 3). Preliminary sequencing  
165 suggested that GabiKat-780B11 carries a T-DNA insertion in the third intron of the  
166 *PRS4* gene, and is therefore predicted to be a null allele. No other publicly available T-  
167 DNA insertion lines are predicted to abolish *PRS4* expression. We confirmed the  
168 location of the GabiKat-780B11 T-DNA by PCR (Figure 3A), and named this allele *prs4-*  
169 *1*. We isolated several independent *prs4-1/+* heterozygous plants, allowed the plants to  
170 self-fertilize, collected seed, and genotyped the F<sub>1</sub> generation. We identified only *prs4-*  
171 *1/+* heterozygous or *+/+* plants in a 2:1 ratio, indicating that *prs4-1/prs4-1* is lethal.

172 To confirm that *prs4-1* is lethal and determine when *prs4-1* mutants arrest, we  
173 next examined seeds in the siliques of several *prs4-1/+* plants from separate families.  
174 77% of seeds in these siliques were green with viable embryos, whereas 23% of these  
175 seeds were collapsed and brown (Figure 3B). After histochemically clearing the seeds,  
176 we observed normal embryo morphology in the green seeds, but could not observe a  
177 multicellular embryo in the shrunken seeds (Figure 3C). The green seeds segregated  
178 2:1 for *prs4-1/+* : *+/+*, as predicted for an embryo-lethal allele. We marked the position  
179 of putative *prs4-1/prs4-1* aborted seeds, and noticed that the expected number of seeds  
180 near the apex of the silique were aborted (26.7%,  $n = 180$ ,  $\chi^2 = 0.3$ ,  $p = 0.61$ ), but less  
181 than 20% of seeds near the base of the silique were aborted (18.9%,  $n = 180$ ,  $\chi^2 = 3.6$ ,  
182  $p = 0.058$ ), suggesting a slight pollen transmission defect that could explain why only  
183 23% of *prs4-1/+* offspring are homozygous for the null *prs4-1* allele (Meinke, 1985).  
184 Finally, we generated stable transgenic lines by transforming *prs4-1/+* flowers with T-  
185 DNAs carrying either *35S<sub>PRO</sub>:PRS4-GFP* or *35S<sub>PRO</sub>:YFP-PRS4* (Figure 3D), both of



186 which rescued the lethal phenotype of *prs4-1/prs4-1* seeds. Therefore, we concluded  
187 that *PRS4* is required for the earliest stages of *A. thaliana* sporophyte development.

188 In wild-type *A. thaliana*, *PRS4* transcriptional expression is strongest in  
189 metabolically active cells, especially the shoot apical meristem and germinating seeds  
190 (Supplemental Figure 1). *PRS4* transcriptional expression is notably lower in quiescent  
191 plants, such as seeds entering dormancy and mature pollen grains (Supplemental  
192 Figure 1). The expression patterns of genes that encode the organelle-targeted PRS  
193 enzymes, *PRS2*, *PRS3*, and *PRS5*, are largely similar to *PRS4*, although *PRS2* is  
194 expressed in seeds entering dormancy, and both *PRS2* and *PRS3* are expressed in  
195 mature pollen grains (Supplemental Figure 1). *PRS1* is consistently expressed at very  
196 low levels during development, in contrast to the other *PRS* genes (Supplemental  
197 Figure 1). These expression patterns indicate that PRS enzymes are strongly  
198 expressed in both the cytosol and the organelles in all metabolically active  
199 developmental stages to support PRPP synthesis.

## 200 ***PRS4* promotes ribosome biogenesis**

201 To identify disrupted genetic pathways in TRV::*NbPRS4* plants, we took a global  
202 transcriptomic approach (Figure 4). Nine RNA-Seq libraries were sequenced from  
203 rRNA-depleted RNA extracted from replicated pools of *N. benthamiana* shoot apices  
204 (defined as all tissue above the second-youngest leaf, including the shoot meristem,  
205 some stem, and the youngest two visible leaves; Supplemental Figure 2). Three  
206 libraries each were prepared from mock-silenced plants, TRV::*NbPRS4* plants with  
207 “moderate” visible phenotypes (Figure 2B, middle panel), or TRV::*NbPRS4* plants with  
208 “severe” visible phenotypes (Figure 2B, bottom panel). RNA-Seq confirmed that *PRS4*  
209 expression is effectively silenced in the TRV::*NbPRS4* plants, but not in mock-infected  
210 plants, as expected. 35,877 annotated *N. benthamiana* genes were detected in our  
211 transcriptomes, of which 4,986 were significantly differentially-expressed genes (DEGs)  
212 between TRV::*NbPRS4* and mock-silenced plants (3,213 induced, 1,773 repressed,  $p_{adj}$   
213  $< 0.05$ ) (Figure 4A, Supplemental Data Sets 1 and 2). This large number of DEGs  
214 demonstrates the dramatic effects of disrupting *PRS4* activity on cellular homeostasis.  
215 We detected relatively few DEGs between TRV::*NbPRS4* plants with “moderate” or



216 “severe” visible phenotypes (489 genes,  $p_{adj} < 0.05$ ) (Figure 4A, Supplemental Data Set  
217 3), suggesting that the morphological variation among TRV::*NbPRS4* knockdown plants  
218 does not strongly correlate with differences in gene expression. Principal components  
219 analysis of the nine transcriptomes also showed that the mock-silenced transcriptomes  
220 grouped separately from the TRV::*NbPRS4* knockdown transcriptomes, but that the  
221 “moderate” and “severe” groups were not so readily distinguished (Figure 4A).

222 *N. benthamiana* is an emerging model system whose genome has not been  
223 extensively annotated, so to develop tools to rigorously analyze the TRV::*NbPRS4*  
224 RNA-Seq data, we submitted the entire *N. benthamiana* predicted proteome (genome  
225 version 1.0.1) to Mercator4 for functional annotation using the MapMan gene ontology  
226 (Lohse et al., 2014). This approach conservatively assigned functions to 23,001  
227 annotated genes in *N. benthamiana* (Supplemental Data Set 3), of which 14,502 were  
228 detected in our RNA-Seq analysis and 2,662 were DEGs (Supplemental Data Set 1).  
229 We then used MapMan to identify enriched functional categories in our transcriptomes,  
230 with stringent parameters, using only significant DEGs and the Benjamini-Hochberg-  
231 Yekutieli procedure to correct for the false discovery rate. 48 categories were  
232 significantly affected in TRV::*NbPRS4* versus mock ( $p_{adj} < 0.05$ ) (Figure 4B,  
233 Supplemental Data Set 5), but no categories were significantly affected in the  
234 comparison between the visually “severe” and “mild” phenotype pools of TRV::*NbPRS4*  
235 plants ( $p_{adj} < 0.05$ ), again supporting the hypothesis that the morphological variation we  
236 observed was not due to a consistent difference in the plants’ transcriptional programs.

237 In the TRV::*NbPRS4* transcriptome, one of the most significant effects was  
238 downregulation of genes involved in ribosome biogenesis (Figure 4D, Supplemental  
239 Data Sets 1, 5). To illustrate, the expression of genes encoding 51 of the 81 plant  
240 cytosolic ribosomal proteins were significantly lower in TRV::*NbPRS4* than in mock  
241 controls (Figure 4D, Supplemental Data Set 4). TOR has conserved roles in promoting  
242 expression of ribosomal protein genes (Cardenas et al., 1999; Hannan et al., 2003;  
243 Marion et al., 2004; Xiong et al., 2013a), so their repression likely reflects the  
244 suppression of TOR activity in TRV::*NbPRS4* plants. To determine the consequences  
245 of ribosome biogenesis transcript downregulation in TRV::*NbPRS4* on overall ribosome

246 abundance, we assayed total rRNA in TRV::*NbPRS4* versus mock plants, and found  
247 that rRNA levels were approximately 2-fold lower per fresh weight in TRV::*NbPRS4*  
248 knockdown shoots than in mock-treated plants ( $n \geq 3$ ,  $p < 0.05$ , Figure 4D). Since  
249 ribosomes can account for ~60% of nucleotides and ~25% of proteins in a plant cell, a  
250 two-fold reduction in ribosome abundance represents a dramatic shift in cellular  
251 physiology. Thus, a major effect of knocking down *PRS4* expression is disruption of  
252 ribosome biogenesis, likely a consequence of TOR inactivation (Figure 4E).

253 Various other biological processes were also significantly affected in the  
254 TRV::*NbPRS4* transcriptomes (Figure 4B). Genes involved in cell cycle progression  
255 were broadly repressed, consonant with our observation that both cell size and cell  
256 number are significantly lower in TRV::*NbPRS4* leaves. Genes involved in solute  
257 transport, nutrient uptake, and stress responses, including genes that encode heat  
258 shock proteins and glutathione S-transferases, are among the functional categories that  
259 were significantly induced in TRV::*NbPRS4*. The expression of various transcription  
260 factor (TF) families were also affected in TRV::*NbPRS4*, with a few strong patterns: TFs  
261 typically involved in developmental patterning and differentiation, such as the C2C2 Zn  
262 finger, MADS box, GRF, LOB, and homeobox TFs, were generally down-regulated in  
263 TRV::*NbPRS4*, whereas TFs typically involved in stress responses, such as ERF, NAC,  
264 bZIP, and WRKY TFs, were generally up-regulated in TRV::*NbPRS4* (Figure 4C).  
265 Thus, from a global perspective, the TRV::*NbPRS4* transcriptome demonstrates that  
266 loss of cytosolic PRPP severely disrupts cellular homeostasis, reprogramming the  
267 transcriptome to repress anabolic growth and developmental patterning and to induce a  
268 host of stress responses.

## 269 **Purine and pyrimidine biosynthesis drive TOR activity**

270 PRS4-synthesized cytosolic PRPP contributes primarily to two pathways in  
271 plants cells: cytosolic PRPP is condensed with orotate by cytosolic UMP synthase  
272 (UMPSase), yielding orotidine 5'-monophosphate (OMP), a precursor in *de novo*  
273 pyrimidine biosynthesis; and adenine or hypoxanthine/guanine  
274 phosphoribosyltransferases convert adenine and guanine to AMP and GMP,  
275 respectively, using cytosolic PRPP in the purine salvage pathway. Since the

276 TRV::*NbPRS4* knockdown drastically reduced TOR activity, we hypothesized that one  
277 or both of these pathways—*de novo* pyrimidine synthesis and/or purine salvage—are  
278 required to maintain TOR activity in plant cells.

279 To directly test this hypothesis, we expanded our genetic screen to silence genes  
280 that encode nucleotide biosynthesis enzymes in *N. benthamiana*. Specifically, we  
281 designed VIGS triggers to target critical genes in the *de novo* purine biosynthesis  
282 pathway (*PHOSPHORIBOSYLGLYCINAMIDE FORMYLTRANSFERASE*, or *GART*;  
283 *ADENYLOSUCCINATE LYASE*, or *ASL*; and *PHOSPHORIBOSYLAMINOIMIDAZOLE*  
284 *CARBOXAMIDE FORMYLTRANSFERASE / INOSINE MONOSPHOSPHATE*  
285 *CYCLOHYDROLASE*, or *ATIC*) or in the *de novo* pyrimidine biosynthesis pathway  
286 (*DIHYDROOROTASE*, or *DHOase*; *DIHYDROOROTATE DEHYDROGENASE*, or  
287 *DHODH*; and *URIDINE MONOPHOSPHATE SYNTHASE*, or *UMPSase*). We selected  
288 these enzymes because they do not directly consume ATP or amino acids, and thus are  
289 specifically disrupting only nucleotide biosynthesis (and not incidentally impacting other  
290 primary metabolic pathways). Across experiments, silencing expression of enzymes in  
291 *de novo* pyrimidine or purine biosynthesis disrupted plant development and physiology,  
292 causing delayed growth, reduced leaf size, and striking chlorosis, among other  
293 phenotypes (Figure 5A). Strikingly, TOR activity was severely reduced after silencing  
294 genes involved in either *de novo* purine or pyrimidine biosynthesis, confirming our  
295 hypothesis that nucleotide biosynthesis is required to maintain TOR activity in plants  
296 (Figure 5B).

## 297 **Chemically inhibiting nucleotide biosynthesis inactivates TOR**

298 We next tested whether the hypothesis that nucleotide biosynthesis drives TOR  
299 activity is conserved across plant species by investigating the effects of inhibiting  
300 nucleotide biosynthesis in *A. thaliana*. For this chemical genetic approach, we treated  
301 *A. thaliana* seedlings with inhibitors that specifically impact one or both of the PRS4-  
302 dependent nucleotide biosynthesis pathways, and then assayed for changes in TOR  
303 activity indicated by altered phosphorylation of S6K-T449. We screened four  
304 compounds that target processes that require cytosolic PRPP (Figure 6A). 5-  
305 fluorouracil (5FU) and 5-fluoroorotic acid (5FOA) limit only *de novo* pyrimidine synthesis

306 by inhibiting UMPsase and thymidylate synthetase activity, respectively (Figure 6A). 6-  
307 mercaptopurine (6MP) specifically limits the purine salvage pathway by inhibiting PRPP  
308 transfer to purines by hypoxanthine phosphoribosyltransferases (Figure 6A).  
309 Methotrexate (MTX) limits both purine and pyrimidine biosynthesis by inhibiting  
310 dihydrofolate reductase, which is required for folate synthesis, a necessary nucleotide  
311 precursor (Figure 6A). To assay the effects of these inhibitors, seedlings were grown in  
312  $\frac{1}{2}$  MS media for three days, then transferred to fresh  $\frac{1}{2}$  MS media supplemented with  
313 15 mM glucose and 10  $\mu$ M of one of the nucleotide biosynthesis inhibitors, or a mock  
314 treatment as a negative control. Seedlings were collected 24 h after treatment and  
315 proteins were extracted and analyzed by Western blot (Figure 6C). Under these  
316 conditions, MTX had the strongest effects. *De novo* pyrimidine synthesis inhibitors 5FU  
317 and 5FOA had less potent effects. 6MP, an inhibitor of the purine salvage pathway, had  
318 no noticeable effect on TOR activity, as reflected by S6K-pT449 levels. Some seedlings  
319 were left in media for 7 days after treatment to observe the inhibitors' long-term effects  
320 on growth (Figure 6B). As in the western blot, MTX had the most severe effect on shoot  
321 and root growth (Figure 6B).

322 To demonstrate specificity and further investigate the effects of the nucleotide  
323 biosynthesis inhibitors that were most effective at reducing TOR activity (Figure 6C), we  
324 performed this assay again with a range of concentrations (0.1  $\mu$ M, 1.0  $\mu$ M, 5.0  $\mu$ M, 10  
325  $\mu$ M, or 20  $\mu$ M) of MTX and 5FOA. Consistent with our previous result, we found that  
326 MTX had the strongest effect, partially inhibiting growth and lowering S6K-pT449 levels  
327 even at a very low concentration of 0.1  $\mu$ M. Treatment with 5.0  $\mu$ M or more MTX  
328 caused nearly complete growth arrest, chlorosis, and an even greater decrease in S6K-  
329 pTT49 levels (Figure 6D and 6E). Low concentrations of 5FOA slightly reduced growth  
330 and had some impact on S6K-pT449 levels, whereas higher concentrations (5.0  $\mu$ M to  
331 20  $\mu$ M) strongly inhibited growth and reduced S6K-pT449 levels (Figure 6F and 6G).  
332 Thus, we concluded that complete inhibition of *de novo* nucleotide synthesis by MTX  
333 was most effective at inhibiting TOR, inhibition of *de novo* pyrimidine synthesis was  
334 sufficient to lower TOR activity, and the purine salvage pathway was not needed to  
335 maintain TOR activity under these growth conditions. Given the potent impact of MTX  
336 on TOR activity, we focused further experiments on MTX treatments.

## 337 **Resupplying nucleotides restores TOR activity**

338 First, we conducted a time course to determine how quickly MTX treatment  
339 impacts TOR activity. For these experiments, we used 0.1  $\mu$ M MTX, which was an  
340 approximately minimal concentration to inhibit TOR activity 24 h after treatment. 2 h  
341 after MTX treatment, S6K-pT449 levels were not yet lower (Figure 7A). S6K-pT449  
342 levels rapidly decreased over the next four hours, while total S6K levels remained stable  
343 (Figure 7A). Therefore, under our experimental conditions, MTX begins to lower TOR  
344 activity 3 to 4 h after treatment, ultimately abolishing S6K-pT449 levels by 24 h after  
345 treatment. This is consonant with past experiments using comparable experimental  
346 conditions, which showed that MTX requires at least ~2-6 hours to begin to affect plant  
347 metabolism (Loizeau et al., 2008). To test the hypothesis that MTX inhibition of TOR  
348 activity is due to nucleotide depletion, we supplemented MTX-treated seedlings with 0.5  
349 mM, 1.0 mM or 2.0 mM nucleotides: inosine monophosphates (IMPs), uracil  
350 monophosphates (UMPs), or a mixture of all nucleotide monophosphates (NMPs). We  
351 chose these concentrations because 1.0 – 2.0 mM nucleotides are a physiologically-  
352 relevant concentration (Chen et al., 2000). Neither IMPs nor UMPs were able to restore  
353 TOR activity after 3.5 h, in agreement with our results above suggesting that both purine  
354 and pyrimidine synthesis are required to maintain TOR activity in plants (Figure 7B and  
355 C). A mixture of all NMPs, however, was sufficient to significantly increase S6K-pT449  
356 levels 3.5 h after treatment (Figure 7D). In summary, these experiments demonstrate  
357 that nucleotides are sufficient to activate TOR in MTX-treated seedlings. Therefore, we  
358 concluded that MTX inhibits TOR specifically by limiting nucleotide biosynthesis.  
359 Moreover, in agreement with our hypothesis that TRV::*NbPRS4* knockdowns reduce  
360 TOR activity due to limited nucleotide biosynthesis, these results directly demonstrate  
361 that TOR is sensitive to nucleotide availability in plants.

## 362 **TOR promotes expression of *de novo* nucleotide biosynthesis genes**

363 Among its many metabolic roles, TOR is known to promote nucleotide  
364 biosynthesis in animals and fungi through transcriptional and post-translational control  
365 (Ben-Sahra et al., 2013; Robitaille et al., 2013; Ben-Sahra et al., 2016). We therefore  
366 hypothesized that TOR could also transcriptionally promote nucleotide biosynthesis in



367 plants. To test this hypothesis, we mined publicly available transcriptomic datasets,  
368 focusing on changes in expression of genes that encode nucleotide metabolic enzymes.  
369 We found that genes involved in nucleotide biosynthesis are enriched among the genes  
370 upregulated by the glucose-TOR transcriptional program ( $p < 0.01$ ), as previously noted  
371 (Xiong et al., 2013a), and among the genes repressed when plants are treated with the  
372 TOR inhibitor AZD-8055 ( $p < 0.05$ ) (Dong et al., 2015). Indeed, transcripts encoding  
373 enzymes of nearly every step of purine biosynthesis downstream from PRS-mediated  
374 PRPP synthesis are induced when TOR is activated and repressed when TOR is  
375 inactivated (Figure 8A). Several pyrimidine biosynthesis enzyme genes are also  
376 transcriptionally induced by TOR activation and transcriptionally repressed by TOR  
377 inactivation (Figure 8A). Moreover, genes encoding purine and pyrimidine salvage  
378 pathway enzymes and genes that promote DNA synthesis are also transcriptionally  
379 promoted by TOR (Supplemental Data Set 6). Alongside promoting nucleotide  
380 biosynthesis, TOR transcriptionally controls nucleotide catabolism: genes involved in  $P_i$   
381 salvage, nucleotide degradation, and purine importers are all induced when TOR is  
382 inactivated, whereas genes involved in  $P_i$  salvage are repressed when TOR is  
383 activated. For instance, several NUDIX hydrolases (*NUDT8*, *NUDT13*, and *NUDT15*)  
384 are repressed ~2-3.5-fold when TOR is activated by glucose (Supplemental Data Set 6).  
385 In concert, these data demonstrate that TOR activation broadly reprograms the plant  
386 transcriptome to promote nucleotide biosynthesis and repress nucleotide catabolism.

387 We next reanalyzed the transcriptome of MTX-treated *A. thaliana* cells (Loizeau  
388 et al., 2008) to test how nucleotide deprivation impacts the *A. thaliana* transcriptional  
389 program. Using stringent cutoffs, our analysis revealed 16, 1,748, and 2,485 genes that  
390 are differentially expressed 2 h, 6 h, and 24 h after treatment with MTX, respectively,  
391 compared to mock-treated cells (Supplemental Data Set 6). The remarkably low  
392 number of DEGs detected 2 h after MTX treatment is in keeping with our conclusion  
393 above that MTX treatment has effectively no impact on TOR activity 2 h after treatment.  
394 Therefore, we focused our analysis on the other two timepoints, 6 h and 24 h after MTX  
395 treatment. The biological functions of the DEGs 6 h and 24 h after MTX treatment are  
396 largely similar. Broadly, MTX treatment represses expression of genes involved in  
397 ribosome biogenesis, mitochondrial oxidative phosphorylation (OXHPOS), and



398 photosynthesis, while inducing expression of E3 ubiquitin ligases that promote protein  
399 degradation and amino acid recycling, WRKY and AP2/EREBP transcription factors  
400 involved in stress responses, and various starvation response genes, e.g., the *DARK-*  
401 *INDUCIBLE (DIN)* genes *DIN2*, *DIN6*, and *DIN10* (Supplemental Data Sets 6 and 7).  
402 As with the TRV::*NbPRS4* transcriptome, many of these gene categories are conserved  
403 targets of TOR, such as ribosomal protein genes and mitochondrial OXPHOS  
404 components, which are consistently induced by TOR activity throughout eukaryotic  
405 lineages. Indeed, we found that the set of genes regulated by 24 h treatment with AZD-  
406 8055, a highly specific ATP-competitive TOR kinase inhibitor, significantly overlapped  
407 with the set of genes regulated by 24 h treatment with MTX (553 genes,  $p < 10^{-69}$ ; for  
408 comparison, the maximum expected overlapping genes is 292,  $p = 0.05$ ), and that these  
409 overlapping genes are almost all co-regulated (503 genes, or 91%, are either induced or  
410 repressed in both MTX- and AZD-8055 transcriptomes) (Figure 8C, Supplemental Data  
411 Set 6). The striking similarity between the transcriptional profiles of MTX- and AZD-  
412 8055-treated *A. thaliana* demonstrates that many of the effects of MTX-mediated  
413 nucleotide depletion can be reproduced by TOR inhibition, indicating that nucleotide  
414 sensing by TOR is a crucial signaling axis to maintain metabolic homeostasis (Figure  
415 8D).

416

## 417 **Discussion**

### 418 **Functional genetics to probe TOR signaling networks**

419 TOR is an essential regulatory kinase across all lineages of eukaryotes  
420 (Chantranupong et al., 2015). In *A. thaliana*, null *tor* alleles cause embryo arrest at  
421 early stages of embryogenesis (Menand et al., 2002). Chemically inhibiting TOR kinase  
422 activity or genetically silencing *TOR* expression causes plant growth arrest at later  
423 stages of development (Ahn et al., 2011; Montané and Menand, 2013; Xiong et al.,  
424 2013b). Therefore, we hypothesized that loss of genes required for activity would likely  
425 also be embryo-lethal. To circumvent conducting an arduous forward genetic screen of  
426 embryo-lethal mutants (Kim et al., 2002), we took a “fast reverse genetics” approach  
427 (Baulcombe, 1999), silencing predicted embryo-lethal genes in *N. benthamiana* during  
428 vegetative development with virus-induced gene silencing. With this approach, we  
429 discovered that plant TOR activity is sensitive to nucleotide availability in plants,  
430 consonant with the recent discovery that mammalian TOR also senses nucleotide  
431 availability (Hoxhaj et al., 2017; Emmanuel et al., 2017).

432 Silencing embryo-lethal genes with VIGS does not always cause severe  
433 developmental phenotypes (Stonebloom et al., 2009; Burch-Smith and Zambryski,  
434 2010; Burch-Smith et al., 2011), but silencing the cytosolic phosphoribosyl  
435 pyrophosphate synthetase, *PRS4*, dramatically disrupted plant growth and  
436 development. It should be noted that TRV::*NbPRS4* knockdown phenotypes are more  
437 severe than TRV::*NbTOR* knockdown phenotypes (Ahn et al., 2011), suggesting that  
438 loss of cytosolic PRPP does not exclusively arrest growth via inhibition of the TOR  
439 signaling pathway. Similarly, homozygous *prs4-1* knockout embryos arrest at the very  
440 earliest stages of embryogenesis, whereas homozygous *tor* knockout embryos arrest at  
441 the globular stage. We speculate that the more severe phenotypes of TRV::*NbPRS4*  
442 knockdowns and knockouts reflect its absolute requirement for nucleotide biosynthesis  
443 to support DNA synthesis during cell division.

### 444 **TOR coordinates nucleotide metabolism with ribosome biogenesis**

445 In plant leaves, 40-60% of  $P_o$  is incorporated in ribosomal RNA (rRNA). rRNA  
446 expression and stability are directly controlled by TOR, which promotes expression of  
447 ribosomal protein genes, rRNA, and other genes involved in ribosome biogenesis (Ren  
448 et al., 2011; Kim et al., 2014). In mutant human cell lines with high TOR activity,  
449 overproduction of rRNA disrupts nucleotide homeostasis, making nucleotides less  
450 available for other biological processes (Valvezan et al., 2017). As a consequence,  
451 these cell lines are hypersensitive to nucleotide synthesis inhibitors, which rapidly  
452 deplete nucleotide availability for DNA replication, ultimately triggering DNA damage  
453 responses and cell death (Valvezan et al., 2017). Here, we have shown that TOR  
454 similarly coordinates nucleotide supply and demand in plant cells. TOR promotes  
455 transcription of genes involved in nucleotide biosynthesis and ribosome biogenesis. If  
456 nucleotide levels decrease due to another nutritional limitation or physiological stress,  
457 i.e., despite the transcriptional promotion of nucleotide biosynthesis by TOR, TOR  
458 activity decreases, reducing the demand for nucleotides by ribosome biogenesis.  
459 Based on our findings, and by analogy to the human nucleotide-TOR signaling pathway  
460 (Valvezan and Manning, 2019), we propose that TOR acts as a molecular rheostat to  
461 maintain nucleotide homeostasis in plant cells (Figure 6D).

462 The mechanism of nucleotide sensing by TOR in plants remains unresolved by  
463 this study. In human cells, nucleotide depletion is currently proposed to act through the  
464 TSC-Rheb signaling axis to inhibit TOR activity (Emmanuel et al., 2017; Hoxhaj et al.,  
465 2017). Rheb is a small GTPase that activates TOR at the lysosomal surface, and Rheb  
466 engages TOR when growth factor signals suppress its GTPase-activating protein  
467 complex, TSC. In nucleotide-depleted cells, Rheb GTP-loading decreases, and its  
468 localization, stability, and activity are compromised (Emmanuel et al., 2017; Hoxhaj et  
469 al., 2017). Neither Rheb nor TSC are deeply conserved in eukaryotic lineages, so  
470 plants must have evolved a distinct mechanism for sensing nucleotide availability.  
471 Identifying the nucleotide sensor will be aided by ongoing efforts to elucidate the plant  
472 TOR signaling network (Wu et al., 2019).

473 **TOR and  $P_o$  sensing for sustainable agriculture**

474           The TOR signaling network is a promising candidate for improving agricultural  
475 crops. Current agricultural systems are unsustainable, but biotechnological  
476 enhancement of crops can make significant contributions to sustainability efforts  
477 (Springmann et al., 2018). To date, most studies of nutrient sensing in plants have  
478 focused on pathways that detect inorganic nutrients, such as nitrate, ammonium, and  
479 phosphate (Chiou and Lin, 2011; Xu et al., 2012). In natural settings, however, plants  
480 consume both inorganic and organic nutrients, such as dissolved P<sub>o</sub> and amino acids  
481 (Näsholm et al., 1998). Moreover, once nutrients are absorbed by plants, many species  
482 rapidly convert inorganic nitrogen and phosphate to organic forms for transport and  
483 metabolism. Therefore, understanding the mechanisms of organic nutrient sensing in  
484 plants, including the TOR signaling network, should accelerate efforts to develop  
485 sustainable agricultural crop varieties.

486           Here, we showed that TOR is sensitive to nucleotide availability, a major fraction  
487 of the P<sub>o</sub> available for anabolism (Figure 1A, 8D). Moreover, TOR activity strongly  
488 promotes synthesis of nucleotides and ribosomal nucleic acids to support the high  
489 ribosome abundance required for protein translation in metabolically-active cells.  
490 Accordingly, genetically or chemically dampening TOR activity could reduce  
491 phosphorus demands, by drastically decreasing the rate of nucleotide and nucleic acid  
492 synthesis. Alternatively, for plants grown with excess phosphorus supply, stimulating  
493 TOR activity could increase growth rates and crop yields by increasing phosphorus use  
494 efficiency and allocation of phosphorus to bioactive, productive macromolecules  
495 (nucleotides and rRNA). Therefore, rewiring the TOR signaling network in crop species  
496 could theoretically contribute to enhancing crop yields and reducing reliance on  
497 fertilizers.

498

## 499 **Methods**

### 500 **Plant materials and growth conditions**

501 Plants were grown under standard conditions with 16 h day / 8 h night at ~120  
502  $\mu\text{mol photons m}^{-2} \text{s}^{-1}$  of photosynthetically active radiation and at 22°C-24°C unless  
503 otherwise stated. The inbred Col-0 ecotype was used as wild-type for all *A. thaliana*  
504 seedling experiments. GabiKat-780B11, which had been previously described (Bolle et  
505 al., 2013), was obtained from the Arabidopsis Biological Resources Center. The  
506 reference inbred Nb-1 ecotype, obtained from the Boyce Thompson Institute, was used  
507 for all *N. benthamiana* experiments. *prs4-1* was genotyped by extracting DNA from Col-  
508 0 plants by grinding snap-frozen leaf tissue in DNA extraction buffer (200 mM Tris-Cl at  
509 pH 5.7, 250 mM NaCl, 25 mM EDTA, 0.5% SDS), precipitating DNA in isopropanol,  
510 washing DNA with 70% ethanol, and resuspending purified DNA in ddH<sub>2</sub>O. PCRs were  
511 used to assay for wild-type or T-DNA insertion alleles in 20  $\mu\text{L}$  reactions using GoTaq  
512 Green Master Mix (Promega) using manufacturer's instructions and 30 cycles as  
513 follows: 95°C for 30 seconds, 57°C for 30 seconds, and 72°C for 60 seconds.  
514 Genotyping primers used were: 5'-CAA GGA TTG TCT CTA ATA TCC CCA-3' (left  
515 genomic primer, LP), 5'-CTT TGG GAA GAC ACC ATG AGT TAC-3' (right genomic  
516 primer, RP), and 5'-ATA ATA ACG CTG CGG ACA TCT ACA TTT T-3' (T-DNA border  
517 primer, LB).

### 518 **Molecular cloning**

519 Virus-induced gene silencing vectors were prepared as previously described  
520 (Brunkard et al., 2015). Briefly, RNA was isolated from Nb-1 shoots with the Spectrum  
521 Plant Total RNA kit (Sigma-Aldrich) with on-column DNase I digestion (New England  
522 Biolabs). cDNA was synthesized from RNA using random hexamers and SuperScript III  
523 reverse transcriptase (Fisher Scientific). The *NbPRS4* silencing trigger was amplified  
524 with Phusion DNA polymerase (New England Biolabs) using oligonucleotides 5'-GCA  
525 TCT AGA ATG GAG AAT GGT GCG C-3' and 5'-GAT CTC GAG TTC AAC AGT GGG  
526 ATA CC-3' as primers. The amplified *NbPRS4* PCR product was gel purified (Monarch  
527 DNA Gel Extraction Kit, New England Biolabs), digested with XbaI and XhoI (New  
528 England Biolabs), and ligated with XbaI- and XhoI-digested pYL156 (Liu et al., 2002)

529 using T4 DNA ligase (Promega). Ligations were transformed into house-made  
530 chemically competent *E. coli* DH10B. The silencing triggers for all other nucleotide  
531 biosynthesis genes were amplified with Phusion DNA polymerase (New England  
532 Biolabs) using the oligonucleotides listed in Supplemental Data Set 8. The amplified  
533 products were gel purified (Monarch DNA Gel Extraction Kit, New England Biolabs) and  
534 incubated with 100 ng XbaI- and XhoI-digested pYL156 in a molar ratio of 1 vector : 2  
535 insert. Reactions were incubated with T4 DNA polymerase (New England Biolabs) in  
536 NEBuffer 2.1 (New England Biolabs) for 2.5 minutes at room temperature, placed on ice  
537 for 10 minutes, and then transformed into house-made chemically competent *E. coli*  
538 DH10B. Plasmids were then minipreped with Bioneer kits, Sanger sequenced to  
539 confirm insert sequences, and transformed into *Agrobacterium* GV3101.  
540 Manufacturer's protocols were followed throughout.

541 To clone *AtPRS4* for complementation experiments, cDNA was synthesized from  
542 RNA isolated from Col-0 rosette leaves, using the techniques described above. *PRS4*  
543 was amplified by PCR using oligonucleotides 5'-cacc ATG TCT GAG AAC GCA GCC A-  
544 3' and 5'-AAT CTG CAG AGC ATC AGC AAT-3' and ligated with topoisomerase into a  
545 Gateway entry vector (pENTR/D-TOPO, ThermoFisher). This vector was then digested  
546 with EcoRV (New England Biolabs) and recombined with pEarleyGate expression  
547 vectors pEarleyGate103 and pEarleyGate104 (Earley et al., 2006) using LR Clonase II  
548 (ThermoFisher). After the sequence of these vectors was confirmed, each was  
549 transformed into *Agrobacterium* GV3101 for subsequent transformation of plants.

## 550 **TOR activity assays**

551 *A. thaliana* seedlings or *N. benthamiana* leaves were snap-frozen in liquid  
552 nitrogen. Protein was then extracted from the plant tissue in 100 mM MOPS (pH 7.6),  
553 100 mM NaCl, 5% SDS, 0.5%  $\beta$ -mercaptoethanol, 10% glycerin, 2 mM PMSF, and 1x  
554 PhosSTOP phosphatase inhibitor (Sigma-Aldrich). S6K-pT449 was detected by  
555 Western blot using a phosphospecific antibody (ab207399, AbCam) and an HRP-  
556 conjugated goat anti-rabbit IgG secondary antibody (Jackson Immuno Research, no.  
557 111-035-003). S6K levels were detected by Western blot using a custom monoclonal  
558 antibody described below. Total protein was visualized after transfer using Ponceau S



559 red staining. Western blot images were scanned, converted to grayscale, and adjusted  
560 for contrast and brightness using ImageJ.

561 To generate monoclonal antibodies that detect total S6K protein levels, peptides  
562 were synthesized that corresponded to amino acids 439 through 459 surrounding the  
563 TOR substrate T449 in AtS6K1 (At3g08730.1) with either threonine or  
564 phosphothreonine at T449 (DPKANPFTNFTYVRPPPSFLH or  
565 DPKANPFTNFpTYVRPPPSFLH) and conjugated to either BSA or KLH (GenScript).  
566 BSA-conjugated phosphopeptide was used to immunize mice. Sera were screened  
567 with enzyme-linked immunosorbent assays (ELISAs) for reactivity to KLH-conjugated  
568 peptide and/or phosphopeptide. Subsequent screening of hybridomas with ELISAs  
569 using KLH-conjugated peptide or phosphopeptide and Western blots against S6K  
570 protein identified a monoclonal antibody that reliably detects total S6K protein levels,  
571 regardless of phosphorylation status of T449. Throughout, we refer to this monoclonal  
572 antibody as  $\alpha$ S6K. In one preliminary experiment (Fig. 6C), we used a commercially-  
573 available polyclonal antibody that detects total S6K levels (sc-230, Santa Cruz  
574 Biotechnology); we refer to this antibody as pAb- $\alpha$ S6K.

### 575 **Virus-induced gene silencing**

576 VIGS was performed as previously described (Brunkard et al., 2015). Briefly,  
577 *Agrobacterium* cultures carrying either pYL156 containing the silencing trigger or  
578 pYL192 were grown overnight in LB with antibiotics at 28°C. Cultures were spun down  
579 at 700 x *g* for 10 minutes, washed, and resuspended to OD<sub>600nm</sub> = 1.0 in 10 mM MgCl<sub>2</sub>,  
580 10 mM 2-(*N*-morpholino)ethanesulfonic (MES) acid (pH = 5.7, adjusted with KOH), and  
581 200  $\mu$ M acetosyringone from a recently-prepared 100mM stock solution frozen in  
582 DMSO. *Agrobacteria* were left to induce virulence at room temperature for 2-4 h with  
583 gentle shaking before pressure infiltration into 3-week old *N. benthamiana* leaves by  
584 needleless syringe. Plants were returned to standard growth conditions and monitored.  
585 Tissue collection and phenotypic observation were performed 2 weeks post-infiltration.  
586 TRV::*NbPDS* was used as a positive control to track viral infection and VIGS efficiency,  
587 and TRV::*GUS* (pYC1) was used as a mock treatment negative control (Stonebloom et

588 al., 2009). Each gene was silenced in at least 6 plants per experiment. All VIGS  
589 experiments were performed at least 3 times.

## 590 **Phenotypic analysis of TRV::*NbPRS4* plants**

591 All phenotypic analyses and photography of TRV::*NbPRS4* plants were  
592 performed 2 weeks post-agroinfiltration. Shoot apices were collected for histology and  
593 SEM analysis. The 4<sup>th</sup> youngest leaf (i.e., the 4<sup>th</sup> leaf counting down from the apex of  
594 each plant) was used for quantifying epidermal cell size. Forceps were used to peel off  
595 sections of epidermis from the adaxial side of the leaf, which was then observed under  
596 a compound light microscope with a 40x objective. Cells were outlined manually in  
597 ImageJ to determine area in square micrometers. Measurements were performed on  
598 GUS (“mock”) and “moderate” TRV::*NbPRS4* individuals, as tissue from “severe” plants  
599 was too fragile to process. Plants unused in other experiments were allowed to grow  
600 indefinitely so leaf initiation rate, leaf morphology, and flowering time could be observed.  
601 To quantify rRNA levels, total RNA was extracted using the Sigma Spectrum™ Plant  
602 Total RNA kit and analyzed using the Agilent RNA 6000 Pico Chip with the Agilent  
603 Bioanalyzer 2100.

604 For histology, meristems were harvested from *N. benthamiana* two weeks after  
605 inoculation with *Agrobacterium* cultures carrying either pYL156::*NbPRS4* or  
606 pYL156::GUS (pYC1). Meristems were vacuum infiltrated with infiltration solution (50%  
607 ethanol, 5.0% acetic acid, 3.7% formaldehyde) at 15 Hg for 15 minutes. Tissue was  
608 dehydrated through a stepwise ethanol dehydration series (15%, 20%, 50%, 75%, 95%)  
609 with 15-minute incubations at each step and stored overnight in 95% ethanol + 0.1%  
610 Eosin solution. Samples were washed for 20 minutes with the following solutions: 100%  
611 ethanol (twice), 75% ethanol + 25% HistoClear, 50% ethanol + 50% HistoClear, 25%  
612 ethanol + 75% HistoClear, 100% HistoClear (twice). Tissue was stored overnight in 1:1  
613 HistoClear : melted paraplast solution. The next morning, HistoClear : paraplast solution  
614 was removed and replaced with melted paraplast. Samples were incubated at 56°C for  
615 8-10 hours. Paraplast was replaced every 8-10 hours six additional times. Samples  
616 were poured into plastic weighboats, allowed to harden, sectioned, and mounted onto  
617 slides. Slides were rehydrated through an ethanol series (100%, 100%, 95%, 85%,

618 70%, 50%, 30%, 15%), stained in 0.1% toluidine blue, and then partially dehydrated  
619 through an ethanol series (15%, 30%, 50%, 70%) to destain slightly. Slides were  
620 hydrated again (70%, 50%, 30%, 15%) and rinsed in distilled water. Mounted tissue was  
621 treated with ImmunoHistoMount and covered with a cover slip. Meristems were  
622 visualized with a compound microscope.

### 623 **Phenotypic analysis of *prs4-1* mutants**

624 *prs4-1* / + heterozygous *A. thaliana* mutants were allowed to self-fertilize for  
625 analysis of homozygous *prs4-1* / *prs4-1* progeny in siliques. The location of  
626 homozygous *prs4-1* / *prs4-1* progeny along siliques was marked following standard  
627 protocols (seedgenes.org). For positional analysis, the number of aborted seeds in the  
628 first ten seeds from the silique base (i.e., seeds #1 through #10) and in the second ten  
629 seeds from the silique base (i.e., seeds #11 through #20) was counted in nine  
630 independent siliques at comparable developmental stages from several independent  
631 *prs4-1* / + parents. Seed abortion was not observed in these positions in wild-type  
632 siblings grown under the same conditions. Chi-square tests were used to compare the  
633 frequency of aborted seeds in these positions to the expected frequency (25%) of  
634 aborted seeds. To visualize embryos in *prs4-1* / + progeny, *A. thaliana* seeds were  
635 removed from young siliques and placed on one drop of Hoyer's solution on a  
636 microscope slide. Embryos were visualized with a compound microscope after one hour  
637 of clearing in Hoyer's solution.

### 638 **RNA-Seq and transcriptome analysis**

639 Tissue for RNA-Seq was collected from TRV::*NbPRS4* or mock-treated plants 2  
640 weeks post-agroinfiltration with TRV binary vectors. Plant apices, including the youngest  
641 2-3 leaves, were collected and immediately frozen in liquid nitrogen. 9 mock-treated  
642 individuals, 9 TRV::*NbPRS4* individuals that showed "severe" phenotypic abnormalities,  
643 and 9 "moderate" TRV::*NbPRS4* individuals were collected. RNA was extracted using  
644 Sigma Spectrum™ Plant Total RNA kit. 3 pools of RNA from 3 individuals were  
645 prepared for the mock, severe, and moderate collections. RNA pools were made by  
646 combining 333.3 ng of RNA from each individual. Illumina TruSeq Stranded Total RNA  
647 kit with Ribo-Zero Plant was used to prepare libraries for RNA sequencing. Libraries

648 were sequenced at the Vincent J. Coates Genomics Laboratory (QB3) using the  
649 Illumina Hi-Seq 4000. Reads were aligned with HISAT2 (Kim et al., 2015) and counted  
650 with HTSeq (Anders et al., 2015). Differential transcript abundance was determined  
651 with DESeq2 (Love et al., 2014).

652 The methotrexate-treated transcriptome was previously described (Loizeau et al.,  
653 2008); briefly, cells were treated with 100  $\mu$ M methotrexate or mock-treated for 2 h, 6 h,  
654 or 24 h, RNA was extracted, and cRNA was hybridized with the CATMA array to detect  
655 changes in transcript levels. Only transcripts that were detected at significantly different  
656 levels in both treatment replicates ( $p < 0.05$ ) were considered significant DEGs here.

657 *PRS* expression profiles during plant development were obtained from the Bio-  
658 Analytic Resource for Plant Biology ([bar.utoronto.ca](http://bar.utoronto.ca)) with expression data and an  
659 electronic Fluorescent Pictograph (eFP) developed for AtGenExpress (Schmid et al.,  
660 2005).

661 Transcriptomes were further analyzed with MapMan software (Thimm et al.,  
662 2004). The *N. benthamiana* genome was annotated for gene function using Mercator4  
663 (Lohse et al., 2014). Significantly affected gene categories were determined by  
664 MapMan using a Wilcoxon rank-sum test with the Benjamini-Hochberg-Yekutieli  
665 procedure to correct for the false discovery rate. All MapMan annotations and statistical  
666 analyses are available for review in supplemental data. The lists of differentially  
667 expressed genes from AZD-8055-treated and MTX-treated samples were compared  
668 using a hypergeometric test for significant overlap using R software (phyper function).  
669 For comparative analysis, only those genes that could be detected in both the MTX and  
670 AZD-8055 treatment transcriptomes (i.e., the ~22,000 genes with complementary  
671 probes in the CATMA microarray) were considered.

## 672 **Seedling chemical treatment assays**

673 *35S<sub>PRO</sub>:S6K1-HA* Col-0 seeds (Xiong and Sheen, 2012) were sterilized with a  
674 50% bleach and 0.1% tween-20 solution and stratified in the dark at 4°C for 2 days in  
675 ddH<sub>2</sub>O. Each well of a standard 6-well culture plate was filled with 1 mL of ½ MS, pH  
676 5.7 liquid media. ~20 *35S<sub>PRO</sub>:S6K1-HA* Col-0 seeds were placed in each well under

677 aseptic conditions, and the plate was sealed with micropore tape. Plates were grown at  
678 23°C with a light intensity of 70  $\mu\text{mol m}^{-2} \text{s}^{-1}$  photosynthetically active radiation and a 12  
679 h day / 12 h night cycle for 3 days. The media were then replaced with  $\frac{1}{2}$  MS  
680 supplemented with 15 mM D-glucose, pH 5.7, and any other treatments as described in  
681 the text, and returned to growth chambers. All treatments, transfers, and seedling  
682 collections were performed at subjective dawn unless otherwise noted for consistency.  
683 Photographed seedlings were left in treatment media for 7 days to observe  
684 developmental differences.

685           Methotrexate (Gainger), 6-mercaptopurine (Fisher Scientific), 5-fluorouracil  
686 (Fisher Scientific), 5-fluoroorotic acid (Fisher Scientific), adenosine-5'-monophosphate  
687 disodium (Fisher Scientific), cytidine-5'-monophosphate disodium (Chem-Impex),  
688 guanosine-5'-monophosphate disodium (Chem-Impex), inosine-5'-monophosphate  
689 (TGI), and uracil 5'-monophosphate trisodium (Chem-Impex) were prepared fresh in  
690 concentrated stock solutions that were then diluted in  $\frac{1}{2}$  MS media (Caisson Labs), pH  
691 = 5.7 with KOH, for application to seedlings.

692

## 693 **Acknowledgments**

694 This project was supported by NIH DP5-OD-023072 to J.O.B. M.B. is supported by an  
695 NSF Graduate Research Fellowship. This work used the Vincent J. Coates Genomics  
696 Sequencing Laboratory at UC Berkeley, supported by the NIH-S10-OD018174  
697 Instrumentation Grant. We thank De Wood and Tina Williams at USDA ARS for  
698 microscopy support, Prof. Jen Sheen for sharing *35S<sub>PRO</sub>:S6K-HA A. thaliana* seeds,  
699 Anjali Matharu for experimental assistance, and Sam Leiboff for assistance with RNA-  
700 Seq analysis.

701

## 702 **Author Contributions**

703 M.B., M.R.S., R.H., and J.O.B. designed the research, performed experiments, and  
704 analyzed data. M.B. and J.O.B. wrote the manuscript.

705



706 **References**

- 707 **Ahn, C.S., Han, J.-A., Lee, H.-S., Lee, S., and Pai, H.-S.** (2011). The PP2A regulatory  
708 subunit Tap46, a component of the TOR signaling pathway, modulates growth and  
709 metabolism in plants. *Plant Cell*.
- 710 **Aird, K.M. and Zhang, R.** (2015). Nucleotide metabolism, oncogene-induced  
711 senescence and cancer. *Cancer Lett.*
- 712 **Anders, S., Pyl, P.T., and Huber, W.** (2015). HTSeq--a Python framework to work with  
713 high-throughput sequencing data. *Bioinformatics* **31**: 166–169.
- 714 **Baulcombe, D.C.** (1999). Fast forward genetics based on virus-induced gene silencing.  
715 *Curr. Opin. Plant Biol.*
- 716 **Ben-Sahra, I., Howell, J.J., Asara, J.M., and Manning, B.D.** (2013). Stimulation of de  
717 novo pyrimidine synthesis by growth signaling through mTOR and S6K1. *Science*  
718 (80-. ).
- 719 **Ben-Sahra, I., Hoxhaj, G., Ricoult, S.J.H., Asara, J.M., and Manning, B.D.** (2016).  
720 mTORC1 induces purine synthesis through control of the mitochondrial  
721 tetrahydrofolate cycle. *Science* (80-. ).
- 722 **Bolle, C., Huel, G., Kleinbölting, N., Haberer, G., Mayer, K., Leister, D., and**  
723 **Weisshaar, B.** (2013). GABI-DUPLO: A collection of double mutants to overcome  
724 genetic redundancy in *Arabidopsis thaliana*. *Plant J.*
- 725 **Brunkard, J.O., Burch-Smith, T.M., Runkel, A.M., and Zambryski, P.C.** (2015).  
726 Investigating plasmodesmata genetics with Virus-Induced Gene Silencing and an  
727 *Agrobacterium*-mediated GFP movement assay. In, pp. 185-198 SRC-  
728 GoogleScholar FG-0.
- 729 **Burch-Smith, T.M., Brunkard, J.O., Choi, Y.G., and Zambryski, P.C.** (2011). PNAS  
730 Plus: Organelle-nucleus cross-talk regulates plant intercellular communication via  
731 plasmodesmata. *Proc. Natl. Acad. Sci.* **108**: E1451–E1460.
- 732 **Burch-Smith, T.M. and Zambryski, P.C.** (2010). Loss of increased size exclusion limit

- 733 (ise)1 or ise2 increases the formation of secondary plasmodesmata. *Curr. Biol.* **20**:  
734 989–993.
- 735 **Cardenas, M.E., Cutler, N.S., Lorenz, M.C., Di Como, C.J., and Heitman, J.** (1999).  
736 The TOR signaling cascade regulates gene expression in response to nutrients.  
737 *Genes Dev.* **13**: 3271–3279.
- 738 **Chantranupong, L., Wolfson, R.L., and Sabatini, D.M.** (2015). Nutrient-sensing  
739 mechanisms across evolution. *Cell* **161**: 67–83.
- 740 **Chen, D.L., Delatorre, C.A., Bakker, A., and Abel, S.** (2000). Conditional identification  
741 of phosphate-starvation-response mutants in *Arabidopsis thaliana*. *Planta*.
- 742 **Chiou, T.-J. and Lin, S.-I.** (2011). Signaling Network in Sensing Phosphate Availability  
743 in Plants. *Annu. Rev. Plant Biol.*
- 744 **Cordell, D. and White, S.** (2011). Peak phosphorus: Clarifying the key issues of a  
745 vigorous debate about long-term phosphorus security. *Sustainability*.
- 746 **Correll, D.L.** (1998). The Role of Phosphorus in the Eutrophication of Receiving  
747 Waters: A Review. *J. Environ. Qual.*
- 748 **Couso, I. Pérez-Pérez, ME. Ford, MM. Martínez-Force, E. Hicks, LM Umen, JG.**  
749 **Crespo, JL.** (2020). Phosphorus Availability Regulates TORC1 Signaling via LST8  
750 in *Chlamydomonas*. *Plant Cell*.
- 751 **Cunningham, J.T., Moreno, M. V., Lodi, A., Ronen, S.M., and Ruggero, D.** (2014).  
752 Protein and nucleotide biosynthesis are coupled by a single rate-limiting enzyme,  
753 PRPS2, to drive cancer. *Cell*.
- 754 **Delarue, M. et al.** (2018). mTORC1 Controls Phase Separation and the Biophysical  
755 Properties of the Cytoplasm by Tuning Crowding. *Cell*.
- 756 **Dong, P., Xiong, F., Que, Y., Wang, K., Yu, L., Li, Z., and Ren, M.** (2015). Expression  
757 profiling and functional analysis reveals that TOR is a key player in regulating  
758 photosynthesis and phytohormone signaling pathways in *Arabidopsis*. *Front. Plant*  
759 *Sci.* **6**: 677.

- 760 **Earley, K.W., Haag, J.R., Pontes, O., Opper, K., Juehne, T., Song, K., and Pikaard,**  
761 **C.S.** (2006). Gateway-compatible vectors for plant functional genomics and  
762 proteomics. *Plant J.*
- 763 **Emmanuel, N., Ragunathan, S., Shan, Q., Wang, F., Giannakou, A., Huser, N., Jin,**  
764 **G., Myers, J., Abraham, R.T., and Unsal-Kacmaz, K.** (2017). Purine Nucleotide  
765 Availability Regulates mTORC1 Activity through the Rheb GTPase. *Cell Rep.*
- 766 **Grabiner, B.C., Nardi, V., Birsoy, K., Possemato, R., Shen, K., Sinha, S., Jordan,**  
767 **A., Beck, A.H., and Sabatini, D.M.** (2014). A diverse array of cancer-associated  
768 MTOR mutations are hyperactivating and can predict rapamycin sensitivity. *Cancer*  
769 *Discov.*
- 770 **Hannan, K.M., Brandenburger, Y., Jenkins, A., Sharkey, K., Cavanaugh, A.,**  
771 **Rothblum, L., Moss, T., Poortinga, G., McArthur, G.A., Pearson, R.B., and**  
772 **Hannan, R.D.** (2003). mTOR-Dependent Regulation of Ribosomal Gene  
773 Transcription Requires S6K1 and Is Mediated by Phosphorylation of the Carboxy-  
774 Terminal Activation Domain of the Nucleolar Transcription Factor UBF . *Mol. Cell.*  
775 *Biol.*
- 776 **Vander Heiden, M.G. and DeBerardinis, R.J.** (2017). Understanding the Intersections  
777 between Metabolism and Cancer Biology. *Cell.*
- 778 **Hoxhaj, G., Hughes-Hallett, J., Timson, R.C., Ilagan, E., Yuan, M., Asara, J.M., Ben-**  
779 **Sahra, I., and Manning, B.D.** (2017). The mTORC1 Signaling Network Senses  
780 Changes in Cellular Purine Nucleotide Levels. *Cell Rep.*
- 781 **Ito, J., Bath, T.S., Petzold, C.J., Redding-Johanson, A.M., Mukhopadhyay, A.,**  
782 **Verboom, R., Meyer, E.H., Millar, A.H., and Heazlewood, J.L.** (2011). Analysis of  
783 the Arabidopsis cytosolic proteome highlights subcellular partitioning of central  
784 plant metabolism. *J. Proteome Res.*
- 785 **Kim, D., Langmead, B., and Salzberg, S.L.** (2015). HISAT: A fast spliced aligner with  
786 low memory requirements. *Nat. Methods.*
- 787 **Kim, I., Hempel, F.D., Sha, K., Pfluger, J., and Zambryski, P.C.** (2002). Identification

- 788 of a developmental transition in plasmodesmatal function during embryogenesis in  
789 *Arabidopsis thaliana*. *Development* **129**: 1261–1272.
- 790 **Kim, Y.K., Kim, S., Shin, Y.J., Hur, Y.S., Kim, W.Y., Lee, M.S., Cheon, C.I., and**  
791 **Verma, D.P.S.** (2014). Ribosomal protein s6, a target of rapamycin, is involved in  
792 the regulation of rRNA genes by possible epigenetic changes in *arabidopsis*. *J.*  
793 *Biol. Chem.*
- 794 **Lerbs, S., Wollgiehn, R., and Neumann, D.** (1980). Effect of 5-Fluorouracil on the  
795 synthesis of chloroplast and cytoplasmic ribosomal RNA in leaves of *Nicotiana*  
796 *rustica*. *Biochem. und Physiol. der Pflanz.* **175**: 516–528.
- 797 **Liu, Y., Schiff, M., Marathe, R., and Dinesh-Kumar, S.P.** (2002). Tobacco Rar1,  
798 EDS1 and NPR1/NIM1 like genes are required for N-mediated resistance to  
799 tobacco mosaic virus. *Plant J.* **30**: 415–429.
- 800 **Lohse, M., Nagel, A., Herter, T., May, P., Schroda, M., Zrenner, R., Tohge, T.,**  
801 **Fernie, A.R., Stitt, M., and Usadel, B.** (2014). Mercator: A fast and simple web  
802 server for genome scale functional annotation of plant sequence data. *Plant, Cell*  
803 *Environ.*
- 804 **Loizeau, K., De Brouwer, V., Gambonnet, B., Yu, A., Renou, J.-P., Van Der**  
805 **Straeten, D., Lambert, W.E., Rebeille, F., and Ravanel, S.** (2008). A Genome-  
806 Wide and Metabolic Analysis Determined the Adaptive Response of *Arabidopsis*  
807 Cells to Folate Depletion Induced by Methotrexate. *PLANT Physiol.*
- 808 **López-Arredondo, D.L., Leyva-González, M.A., González-Morales, S.I., López-**  
809 **Bucio, J., and Herrera-Estrella, L.** (2014). Phosphate Nutrition: Improving Low-  
810 Phosphate Tolerance in Crops. *Annu. Rev. Plant Biol.*
- 811 **Love, M.I., Huber, W., and Anders, S.** (2014). Moderated estimation of fold change  
812 and dispersion for RNA-seq data with DESeq2. *Genome Biol.*
- 813 **Marion, R.M., Regev, A., Segal, E., Barash, Y., Koller, D., Friedman, N., and**  
814 **O’Shea, E.K.** (2004). Sfp1 is a stress- and nutrient-sensitive regulator of ribosomal  
815 protein gene expression. *Proc. Natl. Acad. Sci.* **101**: 14315–14322.

- 816 **Meinke, D.W.** (1985). Embryo-lethal mutants of *Arabidopsis thaliana*: analysis of  
817 mutants with a wide range of lethal phases. *Theor. Appl. Genet.*
- 818 **Menand, B., Desnos, T., Nussaume, L., Berger, F., Bouchez, D., Meyer, C., and**  
819 **Robaglia, C.** (2002). Expression and disruption of the *Arabidopsis* TOR (target of  
820 rapamycin) gene. *Proc. Natl. Acad. Sci. U. S. A.* **99**: 6422–6427.
- 821 **Montané, M.H. and Menand, B.** (2013). ATP-competitive mTOR kinase inhibitors delay  
822 plant growth by triggering early differentiation of meristematic cells but no  
823 developmental patterning change. *J. Exp. Bot.* **64**: 4361–4374.
- 824 **Näsholm, T., Ekblad, A., Nordin, A., Giesler, R., Högberg, M., and Högberg, P.**  
825 (1998). Boreal forest plants take up organic nitrogen. *Nature.*
- 826 **Pelletier, J., Thomas, G., and Volarevi, S.** (2017). Ribosome biogenesis in cancer:  
827 New players and therapeutic avenues. *Nat. Rev. Cancer.*
- 828 **Ren, M., Qiu, S., Venglat, P., Xiang, D., Feng, L., Selvaraj, G., and Datla, R.** (2011).  
829 Target of rapamycin regulates development and ribosomal RNA expression  
830 through kinase domain in *Arabidopsis*. *Plant Physiol.*
- 831 **Robitaille, A.M., Christen, S., Shimobayashi, M., Cornu, M., Fava, L.L., Moes, S.,**  
832 **Prescianotto-Baschong, C., Sauer, U., Jenoe, P., and Hall, M.N.** (2013).  
833 Quantitative phosphoproteomics reveal mTORC1 activates de novo pyrimidine  
834 synthesis. *Science* (80-. ).
- 835 **Saxton, R.A. and Sabatini, D.M.** (2017). mTOR Signaling in Growth, Metabolism, and  
836 Disease. *Cell.*
- 837 **Schmid, M., Davison, T.S., Henz, S.R., Pape, U.J., Demar, M., Vingron, M.,**  
838 **Schölkopf, B., Weigel, D., and Lohmann, J.U.** (2005). A gene expression map of  
839 *Arabidopsis thaliana* development. *Nat. Genet.* **37**: 501–506.
- 840 **Shi, L., Wu, Y., and Sheen, J.** (2018). TOR signaling in plants: conservation and  
841 innovation. *Development.*
- 842 **Springmann, M. et al.** (2018). Options for keeping the food system within

- 843 environmental limits. *Nature*.
- 844 **Stonebloom, S., Burch-Smith, T., Kim, I., Meinke, D., Mindrinos, M., and**  
845 **Zambryski, P.** (2009). Loss of the plant DEAD-box protein ISE1 leads to defective  
846 mitochondria and increased cell-to-cell transport via plasmodesmata. *Proc. Natl.*  
847 *Acad. Sci. U. S. A.* **106**: 17229–17234.
- 848 **Sulpice, R. et al.** (2014). Low levels of ribosomal RNA partly account for the very high  
849 photosynthetic phosphorus-use efficiency of Proteaceae species. *Plant, Cell*  
850 *Environ.*
- 851 **Theodorou, M.E. and Plaxton, W.C.** (1993). Metabolic Adaptations of Plant  
852 Respiration to Nutritional Phosphate Deprivation. *Plant Physiol.*
- 853 **Thimm, O., Bläsing, O., Gibon, Y., Nagel, A., Meyer, S., Krüger, P., Selbig, J.,**  
854 **Müller, L. a., Rhee, S.Y., and Stitt, M.** (2004). MAPMAN: A user-driven tool to  
855 display genomics data sets onto diagrams of metabolic pathways and other  
856 biological processes. *Plant J.* **37**: 914–939.
- 857 **Valvezan, A.J. et al.** (2017). mTORC1 Couples Nucleotide Synthesis to Nucleotide  
858 Demand Resulting in a Targetable Metabolic Vulnerability. *Cancer Cell*.
- 859 **Valvezan, A.J. and Manning, B.D.** (2019). Molecular logic of mTORC1 signalling as a  
860 metabolic rheostat. *Nat. Metab.* **1**: 321–333.
- 861 **Vance, C.P., Uhde-Stone, C., and Allan, D.L.** (2003). Phosphorus acquisition and use:  
862 Critical adaptations by plants for securing a nonrenewable resource. *New Phytol.*
- 863 **Veneklaas, E.J., Lambers, H., Bragg, J., Finnegan, P.M., Lovelock, C.E., Plaxton,**  
864 **W.C., Price, C.A., Scheible, W.R., Shane, M.W., White, P.J., and Raven, J.A.**  
865 (2012). Opportunities for improving phosphorus-use efficiency in crop plants. *New*  
866 *Phytol.*
- 867 **Witz, S., Jung, B., Fürst, S., and Möhlmann, T.** (2012). De Novo Pyrimidine  
868 Nucleotide Synthesis Mainly Occurs outside of Plastids, but a Previously  
869 Undiscovered Nucleobase Importer Provides Substrates for the Essential Salvage  
870 Pathway in Arabidopsis . *Plant Cell*.



- 871 **Wu, Y., Shi, L., Li, L., Fu, L., Liu, Y., Xiong, Y., and Sheen, J.** (2019). Integration of  
872 nutrient, energy, light and hormone signalling via TOR in plants. *J. Exp. Bot.*
- 873 **Xiong, Y., McCormack, M., Li, L., Hall, Q., Xiang, C., and Sheen, J.** (2013a).  
874 Glucose-TOR signalling reprograms the transcriptome and activates meristems.  
875 *Nature* **496**: 181–186.
- 876 **Xiong, Y., McCormack, M., Li, L., Hall, Q., Xiang, C., and Sheen, J.** (2013b).  
877 Glucose-TOR signalling reprograms the transcriptome and activates meristems.  
878 *Nature* **496**: 181–186.
- 879 **Xiong, Y. and Sheen, J.** (2012). Rapamycin and glucose-target of rapamycin (TOR)  
880 protein signaling in plants. *J. Biol. Chem.* **287**: 2836–2842.
- 881 **Xu, G., Fan, X., and Miller, A.J.** (2012). Plant nitrogen assimilation and use efficiency.  
882 *Annu. Rev. Plant Biol.* **63**: 153–82.
- 883

## 884 Figure Legends

885 **Figure 1.** Ribosomes are major sinks for organic phosphorus in plant cells. **(A)** As much  
886 as 50% of organic phosphorus ( $P_o$ ) is allocated to ribosomal RNA in plant cells. The  
887 remaining  $P_o$  is allocated to nucleic acids (transfer RNAs (~2%), messenger RNAs  
888 (~1%), and DNA (~7%)), phospholipids (~30%), and phosphoesters (~20%), including  
889 phosphorylated proteins and metabolites, e.g., free nucleotide triphosphates. **(B)** Plant  
890 genomes encode several phosphoribosyl pyrophosphate (PRPP) synthetases (PRSs)  
891 that localize to either the cytosol (left) or organelles (right). In *A. thaliana*, there are five  
892 *PRS* genes: *PRS4* encodes the only cytosolic PRS, and *PRS1*, *PRS2*, *PRS3*, and  
893 *PRS5* encode organelle-targeted PRSs. In the cytosol, PRPP is primarily metabolized  
894 via the purine salvage and *de novo* pyrimidine synthesis pathways. Conversely, in the  
895 organelles, PRPP is metabolized in the pyrimidine salvage and *de novo* purine  
896 synthesis pathways.

897 **Figure 2. Cytosolic PRS (PRS4) drives plant development and TOR activity in *N.***  
898 ***benthamiana*.** **(A)** Silencing *PRS4* drastically reduces TOR activity. S6K-pT449 levels  
899 reflect TOR activity, because S6K-T449 is a direct substrate of TOR (Xiong and Sheen,  
900 2012). S6K-pT449 and total S6K levels were assayed by Western blots in knockdown  
901 TRV::*NbPRS4* plants or mock controls (representative images shown here).  
902 Quantification of band densities confirmed that S6K-pT449 levels decrease ~5-fold in  
903 TRV::*NbPRS4* knockdowns, but total S6K levels are not affected in TRV::*NbPRS4*. **(B)**  
904 *PRS4* is required for shoot development. There are fewer leaves in TRV::*NbPRS4*  
905 knockdowns, and the leaves are misshapen and small. We observed individual-to-  
906 individual variation in phenotypic severity after silencing *PRS4* by VIGS; a  
907 representative of the “moderate” TRV::*NbPRS4* phenotype and of the “severe”  
908 TRV::*NbPRS4* phenotype are shown. Outlines of leaf shapes are shown, including all  
909 leaves with silenced *PRS4* expression (i.e., only leaves above the primary infected leaf),  
910 with the oldest leaf on the left and the youngest leaf on the right. **(C)** Silencing *PRS4*  
911 impairs cell expansion and cell division. Epidermal pavement cell shape was not  
912 dramatically altered in TRV::*NbPRS4* knockdowns, but epidermal pavement cell size  
913 was significantly lower. This difference in cell size is insufficient to account for the  
914 decrease in total leaf area shown in panel B; therefore, there are also fewer epidermal  
915 pavement cells in TRV::*NbPRS4*. **(D)** We did not observe clear effects of silencing  
916 *PRS4* on vegetative shoot apical meristem morphology.

917 **Figure 3. Cytosolic PRS4 is required for embryogenesis.** **(A)** *PRS4* is encoded by  
918 *At2g42910*. We isolated an insertional allele, GK-780B11, that we named *prs4-1*. **(B)**  
919 Representative silique of a self-fertilized *prs4-1* / + heterozygous parent. 23% of seeds  
920 are *prs4-1* / *prs4-1* homozygotes; these seeds are shrunken and brown. **(C)**  
921 Homozygous *prs4-1* seeds have no readily visible embryo after clearing. A sibling WT  
922 seed from the same silique with a clearly visible early torpedo-shaped embryo is shown  
923 for comparison. **(D)**  $35S_{PRO}::YFP-PRS4$  expressed in *A. thaliana* localizes to the  
924 cytoplasm.

925 **Figure 4. Silencing *PRS4* reprograms the transcriptome to repress ribosome**  
926 **biogenesis. (A)** Scatterplots of gene expression changes in *N. benthamiana* after  
927 VIGS. 4,986 genes were significantly differentially expressed between TRV::*NbPRS4*  
928 knockdowns with severe phenotypes and mock plants (top panel), but only 489 genes  
929 were significantly differentially expressed between TRV::*NbPRS4* knockdowns with  
930 severe versus moderate phenotypes (middle panel). Principal component analysis  
931 demonstrates that the mock-treated transcriptomes are readily distinguished from the  
932 TRV::*NbPRS4* knockdowns, but that the TRV::*NbPRS4* transcriptomes from plants with  
933 severe or moderate phenotypes are not grouped separately. **(B)** MapMan functional  
934 analysis of DEGs in TRV::*NbPRS4* revealed 48 significantly-affected categories ( $p_{adj.} <$   
935 0.05). Categories with primarily repressed gene expression are indicated in blue;  
936 categories with primarily induced gene expression are indicated in magenta; categories  
937 with genes that are both induced and repressed (e.g., transcription factors) are shown in  
938 grey. **(C)** Transcription factor mRNA levels are significantly different in TRV::*NbPRS4*  
939 knockdowns. Select transcription factor families typically involved in plant development  
940 (C2C2, Cys<sub>2</sub>Cys<sub>2</sub> Zn-finger family; MADS, MCM1/AGAMOUS/DEFICIENS/SRF box  
941 family; GRF, GROWTH-REGULATING FACTOR family; LOB, LATERAL ORGAN  
942 BOUNDARIES family; and the homeobox family) or plant stress responses (ERF,  
943 ETHYLENE RESPONSE FACTOR family, excluding AP2 orthologues; bZIP, basic  
944 Leucine Zipper Domain family; HSF, Heat Shock Factor; NAC, NAM/ATAF1/CUC2  
945 family; and the WRKY family). **(D)** mRNAs encoding 51 subunits of the plant cytosolic  
946 ribosome were down-regulated in TRV::*NbPRS4* (shown in this model of a ribosome in  
947 blue); mRNAs encoding 2 subunits were up-regulated (magenta). There was ~50% less  
948 total rRNA in TRV::*NbPRS4* knockdowns ( $*p < 0.05$ ). **(E)** Transcriptomic analysis  
949 demonstrates that *PRS4* is required to promote expression of genes that contribute to  
950 ribosome biogenesis (purple, right) and cell cycle progression, and to repress induction  
951 of starvation and oxidative stress response genes, including solute transporters and  
952 antioxidant glutathione S-transferases (rainbow, left).

953 **Figure 5. Silencing key genes in nucleotide biosynthesis inhibits TOR activity. (A)**  
954 Nucleotide biosynthesis is necessary for normal shoot development and physiology.  
955 Silencing genes downstream of *PRS4* in nucleotide biosynthesis in *N. benthamiana*  
956 reduced leaf number and size, disrupted leaf shape, and caused chlorosis, similar to the  
957 phenotypes observed in TRV::*NbPRS4* plants. Each gene was silenced in at least six  
958 plants per experiment, and the entire experiment was replicated three times;  
959 representative individuals of each silenced gene are shown. **(B)** Silencing nucleotide  
960 biosynthesis genes lowers TOR activity. S6K-pT449 levels are strongly reduced in  
961 silenced plants compared to mock-infected controls, and the S6K-pT449/S6K ratios are  
962 consistently lower.

963 **Figure 6. Chemically inhibiting nucleotide biosynthesis suppresses TOR activity.**  
964 **(A)** PRPP synthesized by cytosolic *PRS4* is primarily used for purine salvage and *de*  
965 *novo* pyrimidine synthesis. 6MP specifically inhibits purine salvage, 5FOA and 5FU  
966 specifically inhibit *de novo* pyrimidine synthesis, and MTX broadly inhibits nucleotide  
967 biosynthesis. **(B)** Seedlings were grown to quiescence, and then treated with either 15

968 mM glucose, which activates TOR and promotes root elongation (Xiong et al., 2013a),  
969 or 15 mM glucose and 10  $\mu$ M MTX, 6MP, 5FU, or 5FOA, which limit nucleotide  
970 biosynthesis. Seedling growth was most drastically impaired in the presence of MTX,  
971 which inhibits all nucleotide biosynthesis. Treatment with 5FOA strongly impacted  
972 seedling growth as well, while 5FU and 6MP had less dramatic effects. **(C)** Seedlings  
973 were treated with 10  $\mu$ M of each inhibitor shown in panel A for 24 h. TOR activity was  
974 assayed using Western blots against S6K-pT449 and total S6K, with Ponceau staining  
975 shown as a loading control. MTX, 5FU, and 5FOA all reduced TOR activity. 6MP had  
976 no reproducible effect. This experiment was repeated three times; representative  
977 results are shown here. **(D)** Seedlings were grown as described in panel 6B and  
978 treated with either 0.1  $\mu$ M, 1  $\mu$ M, 5  $\mu$ M, 10  $\mu$ M, or 20  $\mu$ M MTX. A photograph was taken  
979 7 days after treatment. Growth was inhibited by all concentrations of MTX tested. **(E)**  
980 TOR activity was assayed using Western blots against S6K-pT449 and total S6K, with  
981 Ponceau staining shown as a loading control. 24-hour MTX treatment is effective at  
982 inhibiting TOR activity at a concentration as low as 0.1  $\mu$ M, and 1.0  $\mu$ M MTX treatment  
983 effectively inactivates TOR entirely. **(F)** Seedlings were grown as described in panel 6B  
984 and treated with either 0.1  $\mu$ M, 1  $\mu$ M, 5  $\mu$ M, 10  $\mu$ M, or 20  $\mu$ M 5FOA. A photograph was  
985 taken 7 days after treatment. 1  $\mu$ M 5FOA was sufficient to noticeably delay seedling  
986 growth, and higher concentrations had more strong effects on inhibiting development.  
987 **(G)** TOR activity was assayed using Western blots against S6K-pT449 and total S6K,  
988 with Ponceau staining shown as a loading control. A 24-hour treatment with 5FOA has  
989 some effect at 0.1  $\mu$ M, and strongly lowers TOR activity at concentrations  $\geq$  1.0  $\mu$ M.

990 **Figure 7. Nucleotide supply rescues TOR activity in MTX-treated seedlings.** **(A)**  
991 Seedlings were treated with 0.1  $\mu$ M MTX and collected over a time course, as indicated.  
992 TOR activity decrease 3 h after MTX treatment. This experiment was repeated three  
993 times; representative results are shown here. **(B,C,D)** Seedlings were pre-treated with  
994 0.1  $\mu$ M MTX for 3.5 h, and then supplied either inosine 5'-monophosphate (IMP) **(B)**,  
995 uracil 5'-monophosphate (UMP) **(C)**, or a mixture of nucleotide monophosphates  
996 (NMPs) **(D)** at physiologically-relevant concentrations (0.5, 1.0, or 2.0 mM). NMPs  
997 restored S6K-pT449 levels and S6K-pT449/S6K ratios in MTX-treated seedlings,  
998 suggesting that the effects of MTX on TOR activity are due to nucleotide depletion.  
999 Neither IMP nor UMP was sufficient to restore TOR activity, indicating that all  
1000 nucleotides (purines and pyrimidines) are required to stimulate TOR in MTX-treated  
1001 seedlings. This experiment was repeated five times; representative results are shown  
1002 here.

1003 **Figure 8. TOR coordinates nucleotide metabolism with ribosome biogenesis in**  
1004 **plants.** **(A,B)** Enzymes for each step of *de novo* pyrimidine (left) and *de novo* purine  
1005 (right) biosynthetic pathways are shown. Fold-change in mRNA levels of these  
1006 enzymes in **(A)** the glucose-TOR transcriptome (Xiong et al., 2013a) or **(B)** TOR-  
1007 inhibited AZD8055 transcriptome (Dong et al., 2015) are indicated by color, as in panel  
1008 C (induced genes are shown in magenta, repressed genes are shown in blue, grey  
1009 indicates no detected difference in mRNA levels). **(C)** The set of significant DEGs after  
1010 24 h treatment with TOR inhibitor AZD8055 or nucleotide biosynthesis inhibitor MTX  
1011 significantly overlap ( $p < 10^{-69}$ ), and 91% of overlapping DEGs are co-regulated. For  
1012 details, see Supplemental Data Set 6. **(D)** Metabolites activate TOR to drive ribosome

1013 biogenesis. TOR integrates multiple metabolic signaling pathways in plants by sensing  
1014 glucose, nucleotide, and (speculatively) amino acid levels. When other nutrients are  
1015 available (e.g., upon glucose activation of TOR), TOR also drives nucleotide  
1016 biosynthesis, which both reinforces TOR activity and metabolically supports rRNA  
1017 synthesis to contribute to ribosome biogenesis.

1018 **Supplemental Figure 1. *PRS4* is expressed throughout plant development.** *PRS4*  
1019 expression shown in the *A. thaliana* eFP browser (top panel); magenta indicates high  
1020 relative transcript abundance, white indicates low relative transcript abundance. *PRS4*  
1021 is most strongly expressed in metabolically active developmental stages, such as  
1022 imbibed (germinating) seeds and shoot apices. Expression patterns of all *PRS* genes,  
1023 except for *PRS1*, are shown in a bar graph (bottom panel). *PRS4* is consistently  
1024 expressed at higher levels than the other *PRS* genes, except for during late seed  
1025 development and in mature pollen.

1026 **Supplemental Figure 2. (A)** RNA was extracted from shoot apices of *N. benthamiana*  
1027 plants as shown. **(B)** Schematic of seedling treatment assays. Briefly, after  
1028 stratification, seeds were germinated at subjective dawn in ½ MS and allowed to grow  
1029 for three days (to quiescence). Seedling media was then replaced with ½ MS and 15  
1030 mM D-glucose, and left for 24 h to activate TOR and initiate growth. Then, seedlings  
1031 were treated with 0.1 µM MTX or other nucleotide biosynthesis inhibitors, and collected  
1032 as described in the text. Alternatively, after 24 h treatment with MTX, plants were re-  
1033 supplied with nucleotide monophosphates, or mock treatments, and collected for  
1034 analysis.

1035

1036 **Supplemental Data Set 1.** Significant DEGs in TRV::*NbPRS4* knockdown *N.*  
1037 *benthamiana*.

1038 **Supplemental Data Set 2.** Complete transcriptome of TRV::*NbPRS4* knockdown *N.*  
1039 *benthamiana*.

1040 **Supplemental Data Set 3.** Significant DEGs in moderate versus severe TRV::*NbPRS4*  
1041 knockdown *N. benthamiana*.

1042 **Supplemental Data Set 4.** Mercator4 annotation of the Nb-1 v1.0.1 transcriptome.

1043 **Supplemental Data Set 5.** MapMan functional analysis of the TRV::*NbPRS4*  
1044 transcriptome.

1045 **Supplemental Data Set 6.** Transcriptomes of *A. thaliana* treated with MTX, AZD8055,  
1046 or glucose-TOR treatments.

1047 **Supplemental Data Set 7.** MapMan functional analysis of the MTX transcriptome.

1048 **Supplemental Data Set 8.** Oligonucleotides used in this study.



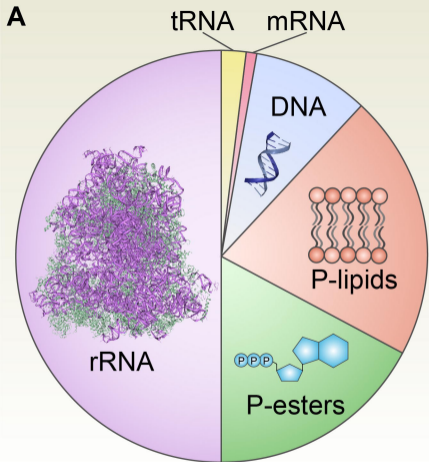

Typical  $P_o$  allocation in plants

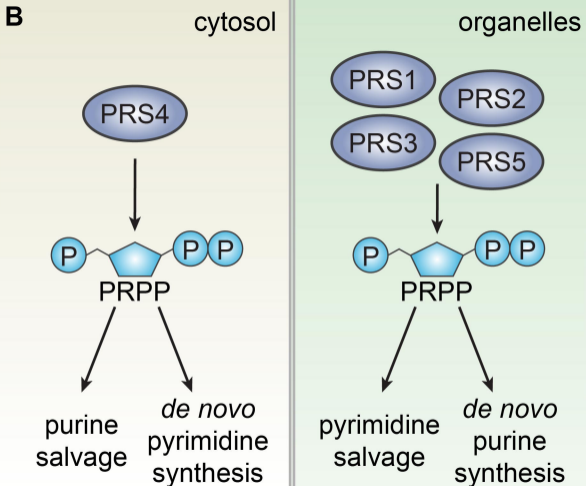



**A**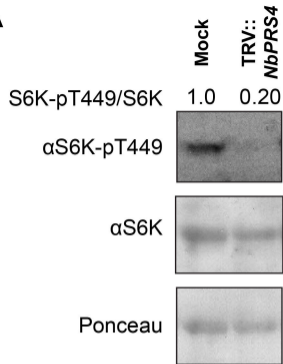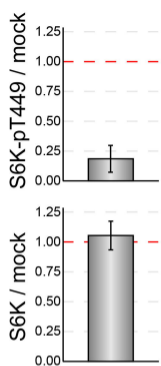**B**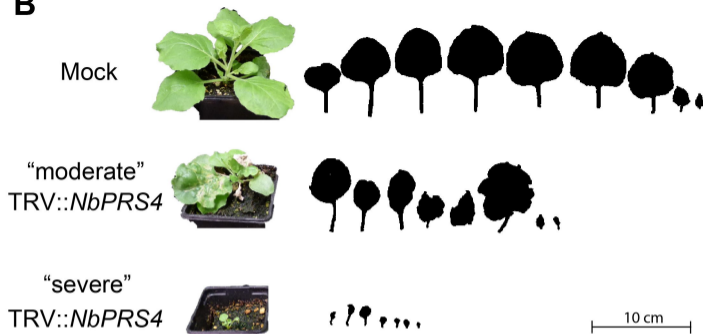**C**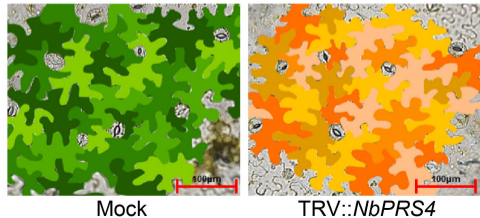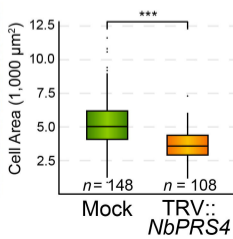**D**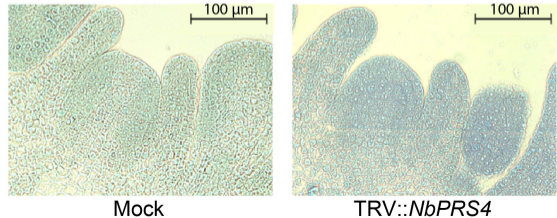

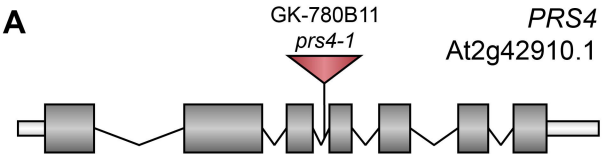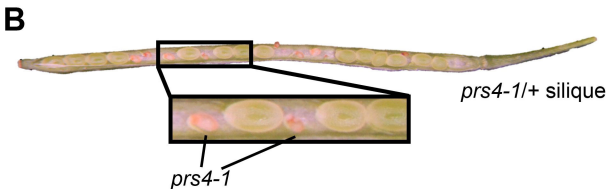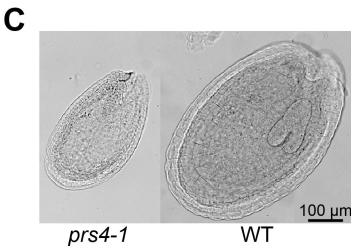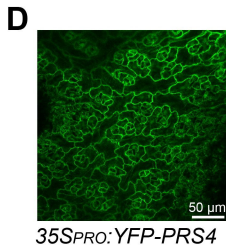

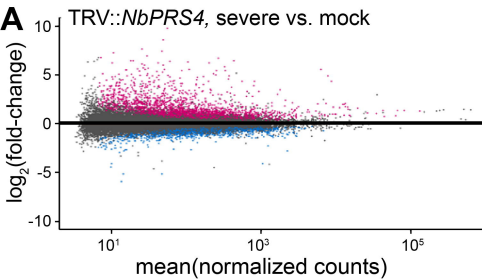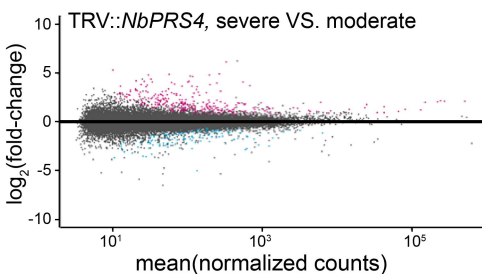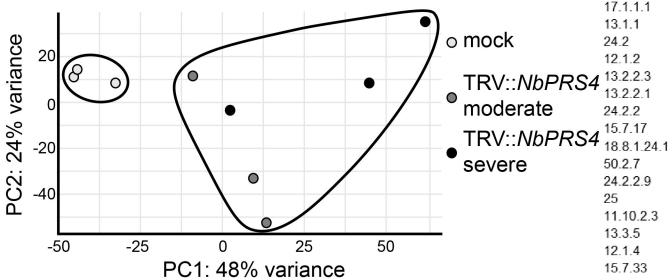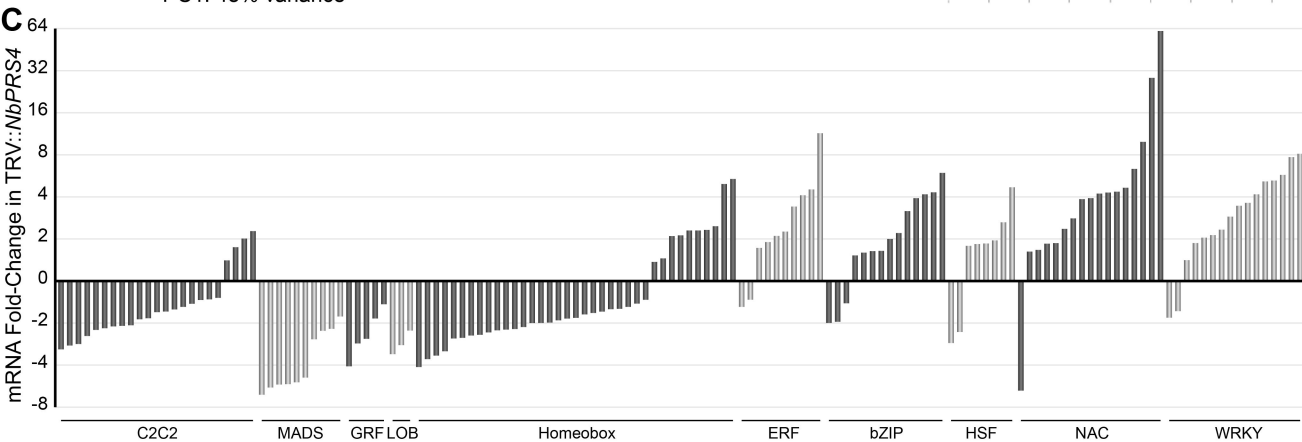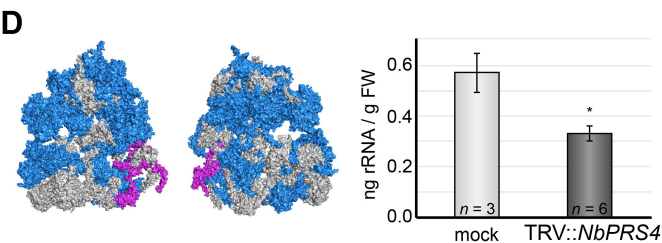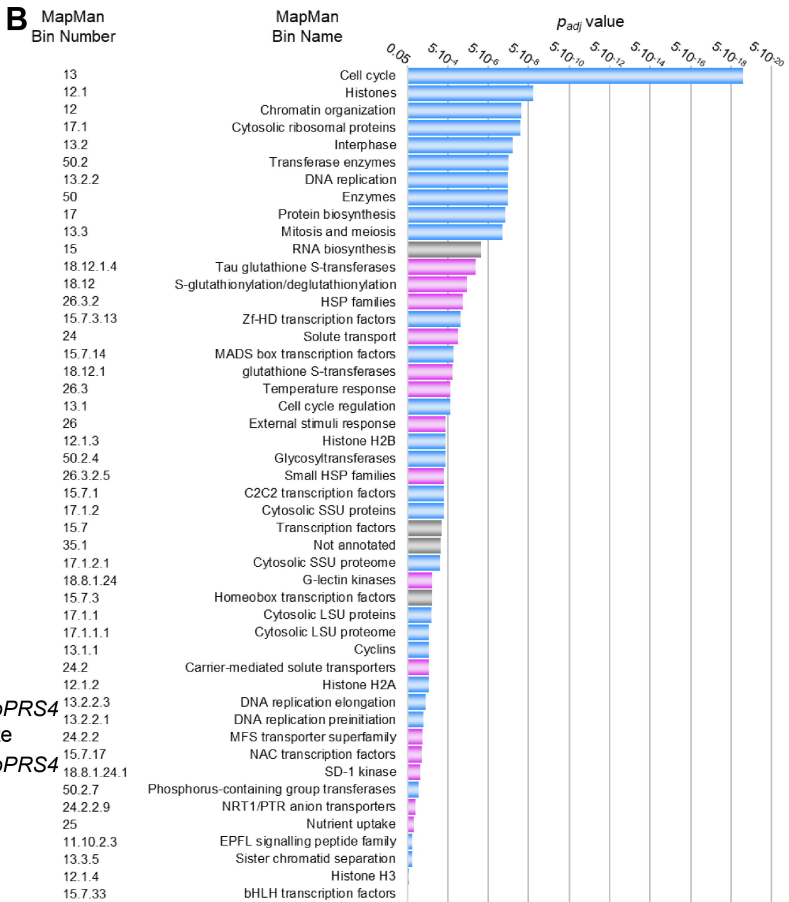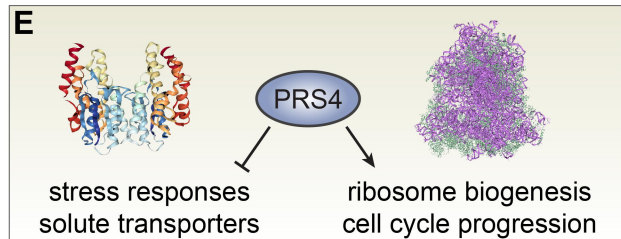

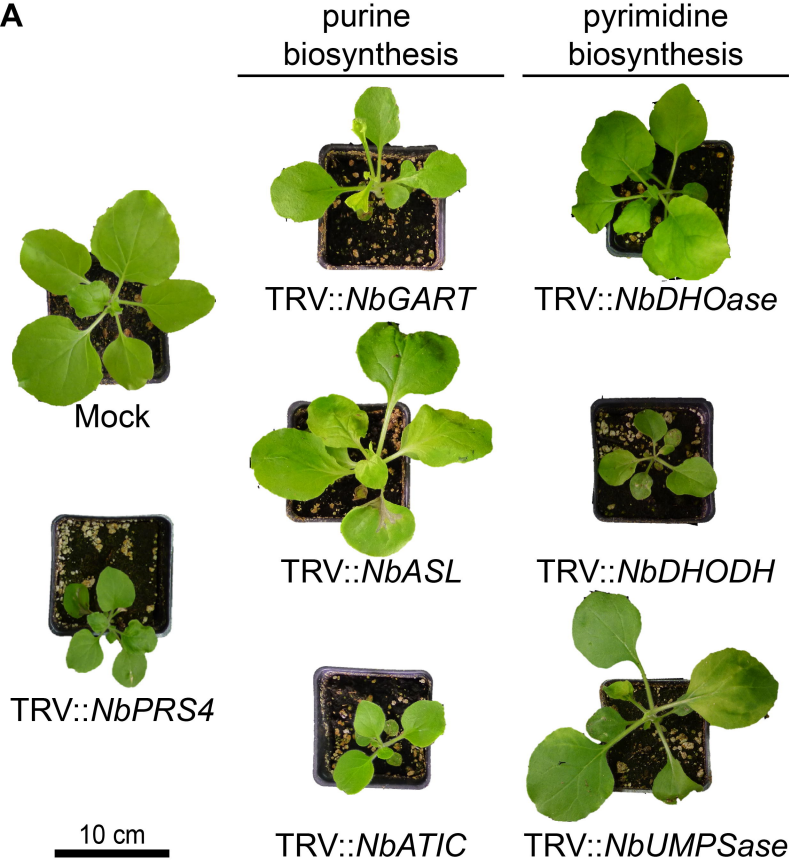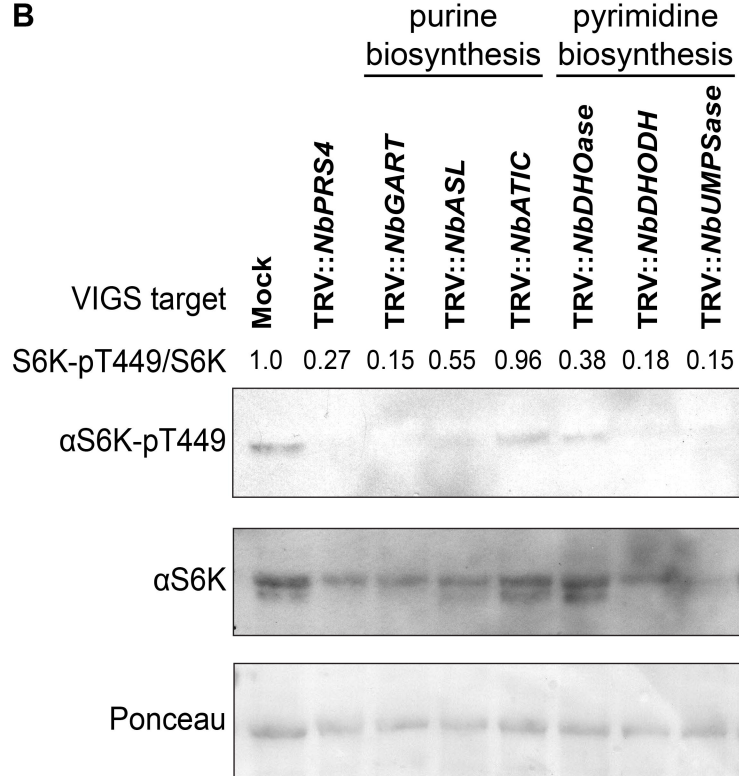

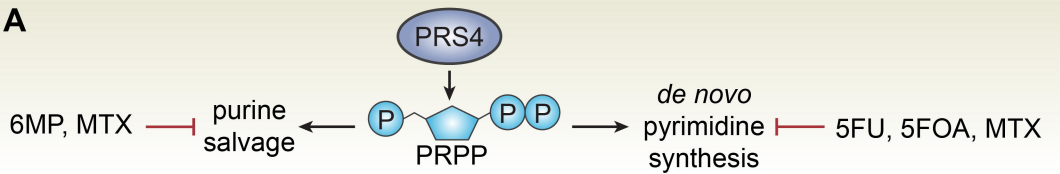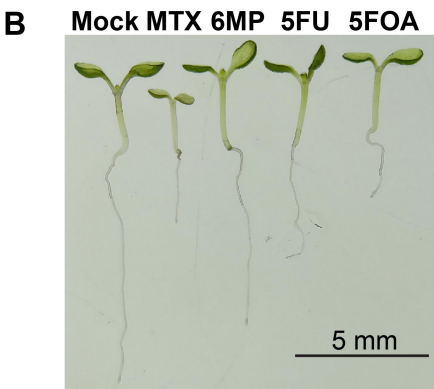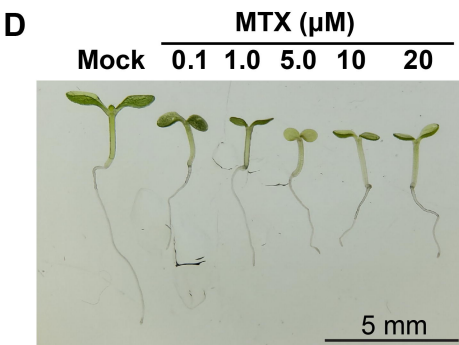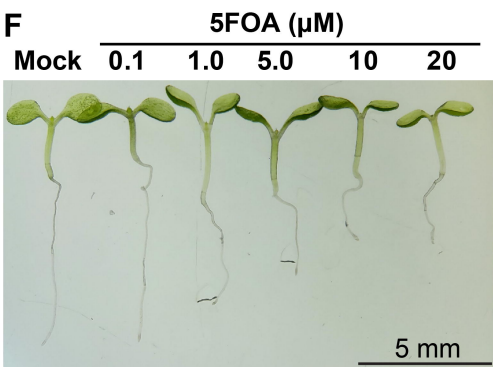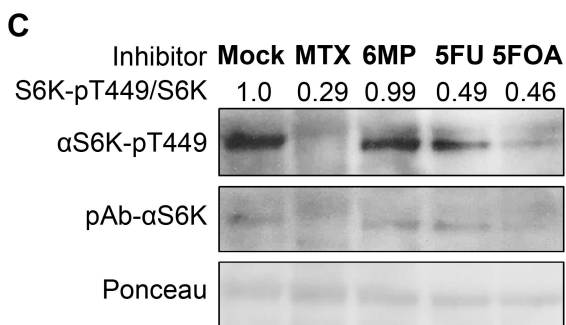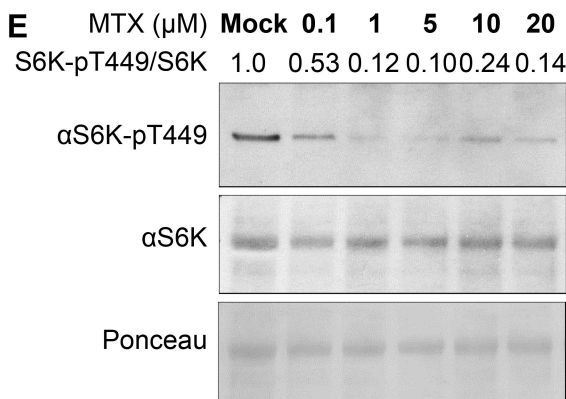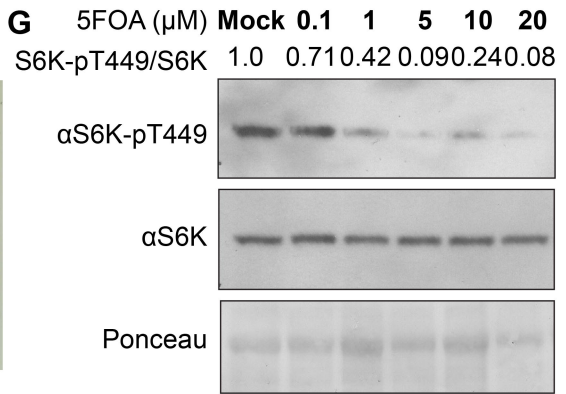

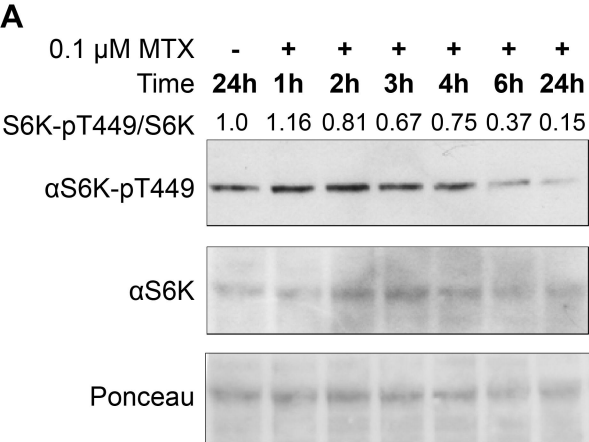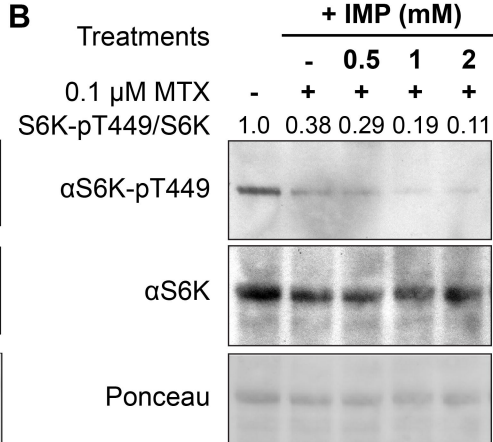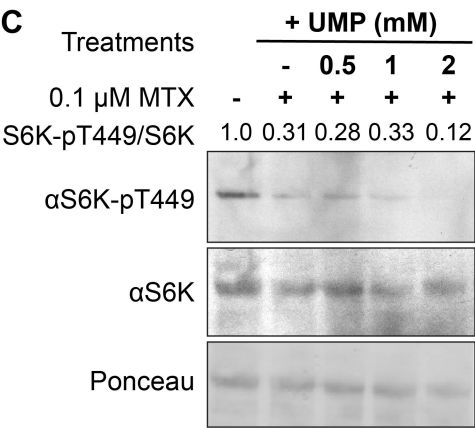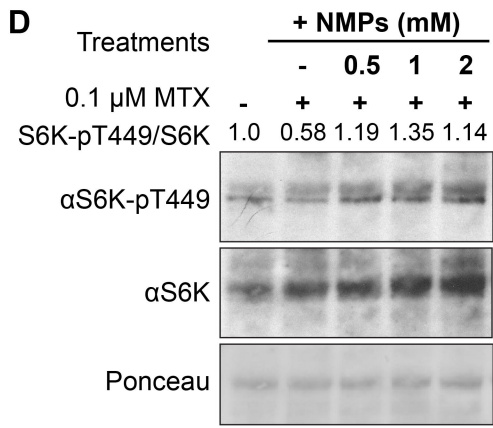



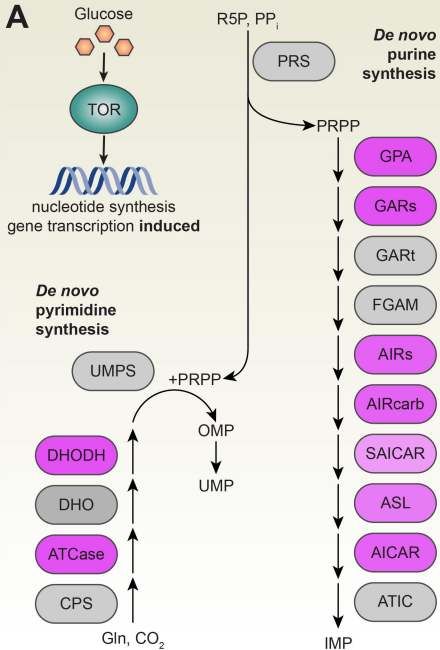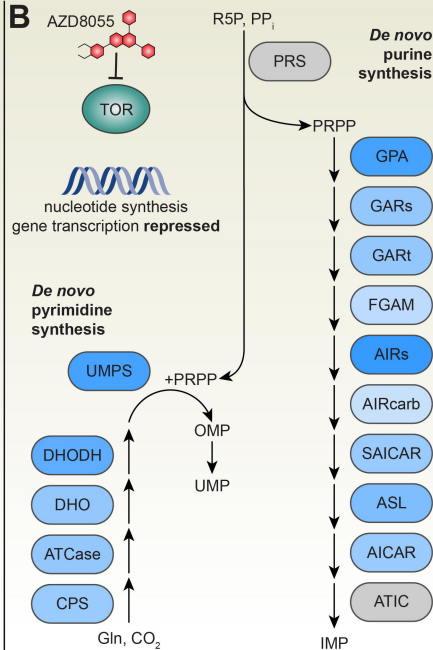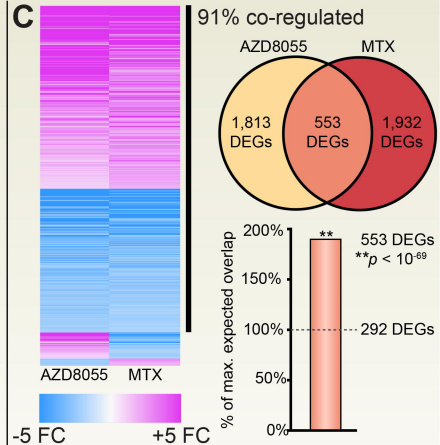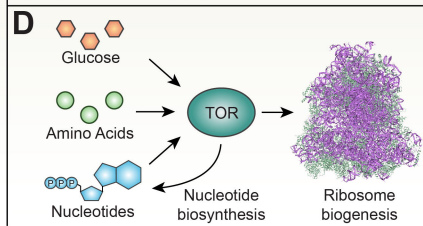

Source: https://www.biorxiv.org/content/biorxiv/early/2020/02/04/2020.01.30.927418.full.pdf
